# Supplementary material for: Gene co-expression analysis of tomato seed maturation reveals tissue-specific regulatory networks and hubs associated with the acquisition of desiccation tolerance and seed vigour
Source: BMC Plant Biol. 2021 Mar 1;21:124. doi: 10.1186/s12870-021-02889-8 (PMC7923611; doi:10.1186/s12870-021-02889-8)
Supplement: Supplementary file 5 — Additional file 5: Table S4. ME10 genes associated with desiccation tolerance and ABI3 regulon [file 12870_2021_2889_MOESM5_ESM.xlsx]

## Sheet: Feuil1
Table S4: ME10 genes associated with desiccation tolerance and ABI3 regulon
ME, module eigengene; GS, gene significance; MM, module membership; p, p-value; DT, desiccation tolerance
Terrasson E, Buitink J, Righetti K, Vu BL, Pelletier S, Zinsmeister J, et al. An emerging picture of the seed desiccome: Confirmed regulators and newcomers identified using transcriptome comparison. Front Plant Sci. 2013;4:1–16.
González-Morales SI, Chávez-Montes RA, Hayano-Kanashir C, Alejo-Jacuind G, Rico-Cambron TY, De Folte S, et al. Regulatory network analysis reveals novel regulators of seed desiccation tolerance in Arabidopsis thaliana. Proc Natl Acad Sci U S A. 2016;113:5232–41.
Mönke G, Seifert M, Keilwagen J, Mohr M, Grosse I, Hähnel U, et al. Toward the identification and regulation of the Arabidopsis thaliana ABI3 regulon. Nucleic Acids Res. 2012;40:8240–54.
				Arabidopsis orthologs							Gene significance		Module membership
gene	module	presence network	Description	AGI	couverture	e-value	blastvalue	Short_description	Curator_summary	Computational_description	GS.DT	p.GS.DT	MM.ME10	p.MM.ME10	DT_Terrasson et al., 2013_González et al., 2016	ABI3 regulon_Mönke et al., 2012
Solyc02g077980.3.1	ME10	1	Unknown protein	NA	NA	NA	NA	NA	NA	NA	0.840057	1.72943e-23	0.986904	9.48893e-67
Solyc09g082110.4.1	ME10	1	Late embryogenesis abundant protein D-34 (AHRD V3.3 *** A0A2G2ZVC9_CAPAN)	AT3G22490.1	61.83	2e-102	303	Seed maturation protein	0	Seed maturation protein; CONTAINS InterPro DOMAIN/s: Seed maturation protein (InterPro:IPR007011); BEST Arabidopsis thaliana protein match is: Seed maturation protein (TAIR:AT3G22500.1); Has 198 Blast hits to 183 proteins in 40 species: Archae - 2; Bacteria - 41; Metazoa - 7; Fungi - 0; Plants - 144; Viruses - 3; Other Eukaryotes - 1 (source: NCBI BLink).	0.878401	5.08171e-28	0.985685	3.56466e-65	both	1
Solyc10g078780.2.1	ME10	1	11 kDa late embryogenesis abundant protein (AHRD V3.3 *-* A0A2G2YPD1_CAPAN)	AT5G06760.1	57.75	5e-21	87.8	Late Embryogenesis Abundant 4-5	Encodes LEA4-5, a member of the Late Embryogenesis Abundant (LEA) proteins which typically accumulate in response to low water availability conditions imposed during development or by the environment. Most of thediverse set of LEA proteins can be grouped according to properties such as high hydrophilicity and high content of glycine or other small amino acids in what has been termed hydrophilins.…	Late Embryogenesis Abundant 4-5 (LEA4-5); CONTAINS InterPro DOMAIN/s: Late embryogenesis abundant protein, group 1 (InterPro:IPR005513); Has 1807 Blast hits to 1807 proteins in 277 species: Archae - 0; Bacteria - 0; Metazoa - 736; Fungi - 347; Plants - 385; Viruses - 0; Other Eukaryotes - 339 (source: NCBI BLink).	0.863631	4.10944e-26	0.985644	4.00557e-65
Solyc07g066400.1.1	ME10	1	seed maturation protein (AHRD V3.3 *-* AT3G12960.1)	AT3G12960.1	70.91	3e-22	87	0	0	unknown protein; Has 44 Blast hits to 44 proteins in 14 species: Archae - 0; Bacteria - 0; Metazoa - 0; Fungi - 0; Plants - 44; Viruses - 0; Other Eukaryotes - 0 (source: NCBI BLink).	0.88677	3.24614e-29	0.983906	4.18554e-63
Solyc03g115370.3.1	ME10	1	Diacylglycerol kinase (AHRD V3.3 *** A0A1U8G5K6_CAPAN)	AT5G07920.3	73.95	0	1103	NA	NA	NA	0.882768	1.24154e-28	0.983702	6.99346e-63
Solyc11g042800.2.1	ME10	1	Embryonic protein DC-8 (AHRD V3.3 *-* A0A2G2XP36_CAPBA)	NA	NA	NA	NA	NA	NA	NA	0.842067	1.07453e-23	0.983637	8.21773e-63
Solyc02g079290.3.1	ME10	1	FLOWERING LOCUS T/ TERMIL FLOWER 1-like protein (AHRD V3.3 *** Q6L5N9_POPNI)	AT1G18100.1	56.9	3e-66	204	PEBP (phosphatidylethanolamine-binding protein) family protein	Encodes a member of the FT and TFL1 family of phosphatidylethanolamine-binding proteins. It is expressed in seeds and up-regulated in response to ABA. Loss of function mutants show decreased rate of germination in the presence of ABA. ABA dependent regulation is mediated by both ABI3 and ABI5. ABI5 promotes MFT expression, primarily in the radicle-hypocotyl transition zone and ABI3 suppresses it …	E12A11; CONTAINS InterPro DOMAIN/s: Phosphatidylethanolamine-binding, conserved site (InterPro:IPR001858), Phosphatidylethanolamine-binding protein PEBP (InterPro:IPR008914); BEST Arabidopsis thaliana protein match is: PEBP (phosphatidylethanolamine-binding protein) family protein (TAIR:AT5G03840.1); Has 2417 Blast hits to 2417 proteins in 371 species: Archae - 0; Bacteria - 118; Metazoa - 639; F…	0.857223	2.36159e-25	0.982112	3.07915e-61
Solyc04g072250.4.1	ME10	1	17.5 kDa class I heat shock protein (AHRD V3.3 *-* A0A2G3CNC4_CAPCH)	AT1G53540.1	48.47	3e-42	142	HSP20-like chaperones superfamily protein	0	HSP20-like chaperones superfamily protein; CONTAINS InterPro DOMAIN/s: Heat shock protein Hsp20 (InterPro:IPR002068), HSP20-like chaperone (InterPro:IPR008978); BEST Arabidopsis thaliana protein match is: heat shock protein 17.4 (TAIR:AT3G46230.1); Has 7090 Blast hits to 7089 proteins in 1610 species: Archae - 175; Bacteria - 4287; Metazoa - 66; Fungi - 302; Plants - 1606; Viruses - 0; Other Euka…	0.872825	2.84448e-27	0.981138	2.65462e-60	terrasson
Solyc09g082100.3.1	ME10	1	Late embryogenesis abundant protein D-34 (AHRD V3.3 *** A0A2G3CT36_CAPCH)	AT3G22490.1	61.89	1e-98	293	Seed maturation protein	0	Seed maturation protein; CONTAINS InterPro DOMAIN/s: Seed maturation protein (InterPro:IPR007011); BEST Arabidopsis thaliana protein match is: Seed maturation protein (TAIR:AT3G22500.1); Has 198 Blast hits to 183 proteins in 40 species: Archae - 2; Bacteria - 41; Metazoa - 7; Fungi - 0; Plants - 144; Viruses - 3; Other Eukaryotes - 1 (source: NCBI BLink).	0.888807	1.60821e-29	0.979876	3.6911e-59	both	1
Solyc12g098900.2.1	ME10	1	Late embryogenesis abundant protein D-29 (AHRD V3.3 *-* A0A2G3B563_CAPCH)	NA	NA	NA	NA	NA	NA	NA	0.904824	3.79873e-32	0.979824	4.09495e-59
Solyc03g025810.4.1	ME10	1	Low-temperature-induced 65 kDa protein (AHRD V3.3 *-* LTI65_ARATH)	AT5G52300.2	38.17	8e-41	158	CAP160 protein	encodes a protein that is induced in expression in response to water deprivation such as cold, high-salt, and dessication. The response appears to be via abscisic acid. The promoter region contains two ABA-responsive elements (ABREs) that are required for the dehydration-responsive expression of rd29B as cis-acting elements. Protein is a member of a gene family with other members found plants, an…	LOW-TEMPERATURE-INDUCED 65 (LTI65); FUNCTIONS IN: molecular_function unknown; INVOLVED IN: response to water deprivation, response to salt stress, response to cold, abscisic acid mediated signaling pathway, response to abscisic acid stimulus; LOCATED IN: cellular_component unknown; EXPRESSED IN: leaf, seed; EXPRESSED DURING: dry seed stage, LP.04 four leaves visible; CONTAINS InterPro DOMAIN/s: C…	0.83938	2.02737e-23	0.978611	4.37551e-58	gonzalez
Solyc07g065990.1.1	ME10	1	oleosin S1-2-like (AHRD V3.3 *** XP_010324233.1)	NA	NA	NA	NA	NA	NA	NA	0.82825	2.49704e-22	0.978577	4.67182e-58
Solyc09g008770.3.1	ME10	1	Late embryogenesis abundant protein (AHRD V3.3 *** A0A200R5C6_9MAGN)	AT2G36640.1	41.58	1e-72	238	embryonic cell protein 63	Encodes putative phosphotyrosine protein belonging to late embryogenesis abundant (LEA) protein in group 3 that might be involved in maturation and desiccation tolerance of seeds. RFLP and CAPS mapping place it on chromosome 4 but the nucleotide sequence maps it to chromosome 2.	embryonic cell protein 63 (ECP63); INVOLVED IN: embryo development ending in seed dormancy; LOCATED IN: cellular_component unknown; EXPRESSED IN: fruit, seed; EXPRESSED DURING: seed development stages; CONTAINS InterPro DOMAIN/s: Late embryogenesis abundant protein, group 4 (InterPro:IPR004238); BEST Arabidopsis thaliana protein match is: late embryogenesis abundant protein, putative / LEA protei…	0.842255	1.02735e-23	0.978383	6.73594e-58	both	1
Solyc01g098850.3.1	ME10	1	D(P)-binding Rossmann-fold superfamily protein (AHRD V3.3 *** A0A1P8AU36_ARATH)	AT1G54870.2	70.47	6e-173	488	NA	NA	NA	0.881586	1.82778e-28	0.977276	5.10872e-57	both	1
Solyc02g084840.3.1	ME10	1	Dehydrin (AHRD V3.3 *** A0A2R4KWH2_9SOLN)	AT3G50980.1	50.97	7e-22	87.8	dehydrin xero 1	0	dehydrin xero 1 (XERO1); FUNCTIONS IN: molecular_function unknown; INVOLVED IN: response to water, response to stress; LOCATED IN: cellular_component unknown; EXPRESSED IN: shoot apex, inflorescence meristem, petal, leaf whorl, seed; EXPRESSED DURING: F mature embryo stage, petal differentiation and expansion stage, E expanded cotyledon stage; CONTAINS InterPro DOMAIN/s: Dehydrin (InterPro:IPR000…	0.885158	5.60555e-29	0.976824	1.13419e-56
Solyc02g091390.3.1	ME10	1	cold-regulated protein (AHRD V3.3 *** AT3G03341.1)	AT3G03341.1	77.46	9e-37	121	0	0	unknown protein; Has 30201 Blast hits to 17322 proteins in 780 species: Archae - 12; Bacteria - 1396; Metazoa - 17338; Fungi - 3422; Plants - 5037; Viruses - 0; Other Eukaryotes - 2996 (source: NCBI BLink).	0.818924	1.78903e-21	0.975416	1.23857e-55	terrasson
Solyc07g062990.2.1	ME10	1	late embryogenesis abundant protein 1-like (AHRD V3.3 --* A0A2I4H8I2_9ROSI)	NA	NA	NA	NA	NA	NA	NA	0.802517	4.40775e-20	0.975384	1.30593e-55
Solyc01g060070.3.1	ME10	1	Outer envelope pore protein 16-2, chloroplastic (AHRD V3.3 *** A0A2G2XR36_CAPBA)	AT4G16160.2	67.66	5e-76	229	Mitochondrial import inner membrane translocase subunit Tim17/Tim22/Tim23 family protein	Homologous to pea OEP16 and barley pPORA (OEP16), a member of Arabidopsis OEP16 family. Two OEP16 genes are closely related to each other and are conserved in all land plants, OEP16-2, also named OEP16-S, and OEP16-1 (renamed OEP16-L) are result of the gene duplication event that occurred prior to divergence of bryophytes and seed plants. Predominantly expressed in seed and is not inducible by co…	ATOEP16-2; FUNCTIONS IN: protein transporter activity, P-P-bond-hydrolysis-driven protein transmembrane transporter activity; INVOLVED IN: protein transport; LOCATED IN: plastid outer membrane, mitochondrial inner membrane presequence translocase complex; EXPRESSED IN: 6 plant structures; EXPRESSED DURING: 6 growth stages; CONTAINS InterPro DOMAIN/s: Mitochondrial inner membrane translocase compl…	0.823952	6.27856e-22	0.974316	7.29461e-55	both	1
Solyc04g017670.3.1	ME10	1	F-box protein (AHRD V3.3 *** H6VUS4_9ROSI)	NA	NA	NA	NA	NA	NA	NA	0.799894	7.15503e-20	0.973849	1.51336e-54	both
Solyc08g077410.4.1	ME10	1	Cytochrome c oxidase (AHRD V3.3 *** A0A200PLW7_9MAGN)	AT1G32710.1	43.36	1e-25	96.3	Cytochrome c oxidase, subunit Vib family protein	0	Cytochrome c oxidase, subunit Vib family protein; FUNCTIONS IN: cytochrome-c oxidase activity; LOCATED IN: mitochondrion; CONTAINS InterPro DOMAIN/s: Cytochrome c oxidase, subunit VIb (InterPro:IPR003213); BEST Arabidopsis thaliana protein match is: cytochrome C oxidase 6B (TAIR:AT1G22450.1); Has 415 Blast hits to 415 proteins in 150 species: Archae - 0; Bacteria - 0; Metazoa - 155; Fungi - 117; …	0.780174	2.20006e-18	0.973499	2.593e-54
Solyc03g113510.2.1	ME10	1	hypothetical protein (AHRD V3.3 *** AT1G16770.1)	AT1G16770.1	66.16	8e-140	403	0	0	unknown protein; Has 109 Blast hits to 109 proteins in 52 species: Archae - 0; Bacteria - 4; Metazoa - 0; Fungi - 71; Plants - 32; Viruses - 0; Other Eukaryotes - 2 (source: NCBI BLink).	0.816863	2.72307e-21	0.973191	4.13337e-54	both
Solyc12g010820.2.1	ME10	1	Late embryogenesis abundant protein (AHRD V3.3 *-* A0A200QFG9_9MAGN)	NA	NA	NA	NA	NA	NA	NA	0.81509	3.89144e-21	0.972822	7.18992e-54
Solyc02g062770.2.1	ME10	1	late embryogenesis abundant protein (AHRD V3.3 *** AT5G66780.1)	AT5G66780.1	44.44	3e-23	90.1	0	0	unknown protein; Has 1807 Blast hits to 1807 proteins in 277 species: Archae - 0; Bacteria - 0; Metazoa - 736; Fungi - 347; Plants - 385; Viruses - 0; Other Eukaryotes - 339 (source: NCBI BLink).	0.89398	2.53779e-30	0.972501	1.15734e-53
Solyc09g015070.3.1	ME10	1	D(P)-linked oxidoreductase superfamily protein (AHRD V3.3 *** A0A2U1N452_ARTAN)	AT5G01670.1	69.78	4e-166	470	NAD(P)-linked oxidoreductase superfamily protein	0	NAD(P)-linked oxidoreductase superfamily protein; FUNCTIONS IN: oxidoreductase activity; INVOLVED IN: oxidation reduction; EXPRESSED IN: 18 plant structures; EXPRESSED DURING: 11 growth stages; CONTAINS InterPro DOMAIN/s: Aldo/keto reductase (InterPro:IPR001395), Aldo/keto reductase subgroup (InterPro:IPR020471), Aldo/keto reductase, conserved site (InterPro:IPR018170); BEST Arabidopsis thaliana …	0.821067	1.14961e-21	0.970876	1.17973e-52	both	1
Solyc02g071760.4.1	ME10	1	oil body-associated protein 2A-like (AHRD V3.3 *** A0A2I4FEE8_9ROSI)	AT1G29680.1	63.91	6e-115	333	Protein of unknown function (DUF1264)	0	Protein of unknown function (DUF1264); CONTAINS InterPro DOMAIN/s: Protein of unknown function DUF1264 (InterPro:IPR010686); BEST Arabidopsis thaliana protein match is: Protein of unknown function (DUF1264) (TAIR:AT5G45690.1); Has 286 Blast hits to 286 proteins in 122 species: Archae - 0; Bacteria - 120; Metazoa - 0; Fungi - 64; Plants - 100; Viruses - 0; Other Eukaryotes - 2 (source: NCBI BLink).	0.809014	1.28614e-20	0.969481	7.81315e-52	gonzalez	1
Solyc12g008430.3.1	ME10	1	Malic enzyme (AHRD V3.3 *** A0A2G3BMK9_CAPCH)	AT1G79750.1	76.22	0	942	NADP-malic enzyme 4	The malic enzyme (EC 1.1.1.40) encoded by AtNADP-ME4 is localized to chloroplasts. The gene is expressed throughout the whole plant and during embryogenesis and germination. A possible involvement in the fatty acid biosynthesis has been proposed.	NADP-malic enzyme 4 (NADP-ME4); CONTAINS InterPro DOMAIN/s: Malic enzyme, NAD-binding (InterPro:IPR012302), Malic oxidoreductase (InterPro:IPR001891), Malic enzyme, conserved site (InterPro:IPR015884), Malic enzyme, N-terminal (InterPro:IPR012301), NAD(P)-binding domain (InterPro:IPR016040); BEST Arabidopsis thaliana protein match is: NADP-malic enzyme 3 (TAIR:AT5G25880.1); Has 9573 Blast hits to…	0.927843	7.12478e-37	0.969256	1.05032e-51
Solyc12g038160.2.1	ME10	1	Lipase (AHRD V3.3 *** A0A2K3PIZ1_TRIPR)	AT1G73920.1	66.23	0	893	alpha/beta-Hydrolases superfamily protein	0	alpha/beta-Hydrolases superfamily protein; FUNCTIONS IN: lipase activity; INVOLVED IN: glycerol biosynthetic process, lipid metabolic process; LOCATED IN: cellular_component unknown; EXPRESSED IN: 24 plant structures; EXPRESSED DURING: 15 growth stages; CONTAINS InterPro DOMAIN/s: AB-hydrolase-associated lipase region (InterPro:IPR006693); BEST Arabidopsis thaliana protein match is: alpha/beta-Hy…	0.81622	3.10105e-21	0.968966	1.53549e-51
Solyc01g016970.2.1	ME10	1	Unknown protein	NA	NA	NA	NA	NA	NA	NA	0.823385	7.07657e-22	0.968569	2.56666e-51
Solyc08g006800.3.1	ME10	1	transmembrane protein (AHRD V3.3 *** AT4G31830.1)	AT4G31830.1	69.31	5e-43	139	0	0	unknown protein; Has 42 Blast hits to 42 proteins in 10 species: Archae - 0; Bacteria - 0; Metazoa - 0; Fungi - 0; Plants - 42; Viruses - 0; Other Eukaryotes - 0 (source: NCBI BLink).	0.806402	2.12216e-20	0.968455	2.96825e-51	terrasson
Solyc01g057000.3.1	ME10	1	Universal stress protein	AT3G11930.2	51.38	6e-64	199	Adenine nucleotide alpha hydrolases-like superfamily protein	0	Adenine nucleotide alpha hydrolases-like superfamily protein; FUNCTIONS IN: molecular_function unknown; INVOLVED IN: response to stress; LOCATED IN: cellular_component unknown; EXPRESSED IN: 18 plant structures; EXPRESSED DURING: 9 growth stages; CONTAINS InterPro DOMAIN/s: UspA (InterPro:IPR006016), Rossmann-like alpha/beta/alpha sandwich fold (InterPro:IPR014729), Universal stress protein A (In…	0.816541	2.90628e-21	0.968209	4.06213e-51	both
Solyc02g014670.2.1	ME10	1	BTB/POZ domain protein (AHRD V3.3 *** A0A1I9LLD2_ARATH)	AT3G19920.2	44.3	3e-124	372	NA	NA	NA	0.867106	1.53315e-26	0.967576	9.00233e-51	gonzalez
Solyc01g009660.3.1	ME10	1	Low-temperature-induced 65 kDa protein (AHRD V3.3 *** A0A1J3DLF3_NOCCA)	NA	NA	NA	NA	NA	NA	NA	0.895487	1.45542e-30	0.966635	2.8544e-50
Solyc09g009490.4.1	ME10	1	ABSCISIC ACID-INSENSITIVE 5-like protein 4 (AHRD V3.3 *** A0A2G2YPC0_CAPAN)	AT2G36270.2	47.72	2e-116	352	NA	NA	NA	0.831183	1.31144e-22	0.96619	4.87226e-50	both
Solyc05g053160.3.1	ME10	1	AWPM-19-like family protein (AHRD V3.3 *** O23029_ARATH)	AT1G04560.1	68.31	2e-89	264	AWPM-19-like family protein	0	AWPM-19-like family protein; FUNCTIONS IN: molecular_function unknown; INVOLVED IN: biological_process unknown; LOCATED IN: endomembrane system; CONTAINS InterPro DOMAIN/s: AWPM-19-like (InterPro:IPR008390); BEST Arabidopsis thaliana protein match is: AWPM-19-like family protein (TAIR:AT5G46530.1); Has 177 Blast hits to 177 proteins in 19 species: Archae - 0; Bacteria - 0; Metazoa - 0; Fungi - 0;…	0.870177	6.26699e-27	0.965255	1.46444e-49	both	1
Solyc06g072680.4.1	ME10	1	HVA22-like protein (AHRD V3.3 *** A0A2G2ZD02_CAPAN)	AT5G50720.1	73.58	3e-49	157	HVA22 homologue E	Encodes one of five HVA22 homologs in Arabidopsis. HVA22 is an ABA- and stress-inducible gene first isolated from barley. Members of this gene family have only been found in eukaryotes. AtHVA22e mRNA is upregulated to varying degrees in response to cold stress, salt stress, ABA treatment or dehydration.	HVA22 homologue E (HVA22E); FUNCTIONS IN: molecular_function unknown; INVOLVED IN: response to water deprivation, response to cold, hyperosmotic salinity response, response to abscisic acid stimulus; LOCATED IN: endomembrane system; EXPRESSED IN: 22 plant structures; EXPRESSED DURING: 12 growth stages; CONTAINS InterPro DOMAIN/s: TB2/DP1/HVA22 related protein (InterPro:IPR004345); BEST Arabidopsi…	0.801584	5.24099e-20	0.964932	2.12629e-49	gonzalez
Solyc01g057165.1.1	ME10	1	Unknown protein	NA	NA	NA	NA	NA	NA	NA	0.821731	1.00112e-21	0.964286	4.43558e-49
Solyc09g082920.1.1	ME10	1	Unknown protein	NA	NA	NA	NA	NA	NA	NA	0.820018	1.42848e-21	0.964274	4.49739e-49
Solyc06g068160.3.1	ME10	1	SNF4	AT1G15330.1	57.58	5e-140	407	Cystathionine beta-synthase (CBS) protein	0	Cystathionine beta-synthase (CBS) protein; CONTAINS InterPro DOMAIN/s: Cystathionine beta-synthase, core (InterPro:IPR000644); BEST Arabidopsis thaliana protein match is: Cystathionine beta-synthase (CBS) family protein (TAIR:AT1G80090.1); Has 526 Blast hits to 526 proteins in 132 species: Archae - 6; Bacteria - 4; Metazoa - 257; Fungi - 91; Plants - 124; Viruses - 0; Other Eukaryotes - 44 (sourc…	0.859069	1.43982e-25	0.964256	4.5892e-49	terrasson
Solyc03g046380.1.1	ME10	1	Seed maturation protein PM41 (AHRD V3.3 *** A0A2K3K2J9_TRIPR)	AT2G21820.1	69.62	9e-31	106	0	0	unknown protein; Has 45 Blast hits to 45 proteins in 13 species: Archae - 0; Bacteria - 0; Metazoa - 0; Fungi - 0; Plants - 45; Viruses - 0; Other Eukaryotes - 0 (source: NCBI BLink).	0.836967	3.55041e-23	0.964212	4.81833e-49
Solyc03g005940.4.1	ME10	1	oil body-associated protein 2A-like (AHRD V3.3 *** A0A2I4FEE8_9ROSI)	AT5G45690.1	65.09	6e-114	332	Protein of unknown function (DUF1264)	0	Protein of unknown function (DUF1264); FUNCTIONS IN: molecular_function unknown; INVOLVED IN: biological_process unknown; LOCATED IN: cellular_component unknown; EXPRESSED IN: seed, leaf; EXPRESSED DURING: seedling growth; CONTAINS InterPro DOMAIN/s: Protein of unknown function DUF1264 (InterPro:IPR010686); BEST Arabidopsis thaliana protein match is: Protein of unknown function (DUF1264) (TAIR:AT…	0.819057	1.74084e-21	0.9638	7.64498e-49	both	1
Solyc02g085770.4.1	ME10	1	AWPM-19-like protein (AHRD V3.3 *-* A0A2U1MYT9_ARTAN)	AT1G04560.1	54.73	8e-51	166	AWPM-19-like family protein	0	AWPM-19-like family protein; FUNCTIONS IN: molecular_function unknown; INVOLVED IN: biological_process unknown; LOCATED IN: endomembrane system; CONTAINS InterPro DOMAIN/s: AWPM-19-like (InterPro:IPR008390); BEST Arabidopsis thaliana protein match is: AWPM-19-like family protein (TAIR:AT5G46530.1); Has 177 Blast hits to 177 proteins in 19 species: Archae - 0; Bacteria - 0; Metazoa - 0; Fungi - 0;…	0.741335	7.37872e-16	0.962849	2.17294e-48	both	1
Solyc03g112590.4.1	ME10	1	Cell division cycle protein 48-like protein (AHRD V3.3 *** A0A2G3CYA7_CAPCH)	AT5G03340.1	88.74	0	1469	ATPase, AAA-type, CDC48 protein	0	ATPase, AAA-type, CDC48 protein; FUNCTIONS IN: protein binding, ATPase activity; LOCATED IN: cell wall; EXPRESSED IN: 24 plant structures; EXPRESSED DURING: 13 growth stages; CONTAINS InterPro DOMAIN/s: ATPase, AAA+ type, core (InterPro:IPR003593), ATPase, AAA-type, core (InterPro:IPR003959), ATPase, AAA-type, conserved site (InterPro:IPR003960), Aspartate decarboxylase-like fold (InterPro:IPR009…	0.791354	3.30057e-19	0.962672	2.63019e-48
Solyc11g008260.2.1	ME10	1	Cysteine proteinase 15A (AHRD V3.3 *** A0A1U8EZ26_CAPAN)	AT3G54940.2	69.33	0	533	Papain family cysteine protease	0	Papain family cysteine protease; FUNCTIONS IN: cysteine-type endopeptidase activity, cysteine-type peptidase activity; INVOLVED IN: proteolysis; LOCATED IN: endomembrane system; EXPRESSED IN: embryo, sepal, carpel; EXPRESSED DURING: 4 anthesis, C globular stage; CONTAINS InterPro DOMAIN/s: Peptidase C1A, papain (InterPro:IPR013128), Proteinase inhibitor I29, cathepsin propeptide (InterPro:IPR0132…	0.78859	5.33136e-19	0.962501	3.16278e-48	gonzalez	1
Solyc03g005943.1.1	ME10	1	Unknown protein	NA	NA	NA	NA	NA	NA	NA	0.876952	8.01325e-28	0.9625	3.16651e-48
Solyc06g061110.2.1	ME10	1	late embryogenesis abundant protein 6 (AHRD V3.3 *** XP_004241969.1)	AT1G32560.1	42.75	2e-23	90.9	Late embryogenesis abundant protein, group 1 protein	0	Late embryogenesis abundant protein, group 1 protein; FUNCTIONS IN: molecular_function unknown; INVOLVED IN: embryo development, embryo development ending in seed dormancy; LOCATED IN: cellular_component unknown; EXPRESSED IN: stem; CONTAINS InterPro DOMAIN/s: Late embryogenesis abundant protein, group 1 (InterPro:IPR005513); BEST Arabidopsis thaliana protein match is: Late embryogenesis abundant…	0.801285	5.53912e-20	0.961878	6.13475e-48
Solyc07g055840.3.1	ME10	1	Citrate synthase (AHRD V3.3 *** A0A2G2WEG9_CAPBA)	AT2G42790.1	83.07	0	863	citrate synthase 3	Encodes a peroxisomal citrate synthase that is expressed throughout seedling and shoot development.	citrate synthase 3 (CSY3); FUNCTIONS IN: citrate (SI)-synthase activity; INVOLVED IN: fatty acid beta-oxidation, tricarboxylic acid cycle; LOCATED IN: peroxisome; EXPRESSED IN: 23 plant structures; EXPRESSED DURING: 15 growth stages; CONTAINS InterPro DOMAIN/s: Citrate synthase-like, large alpha subdomain (InterPro:IPR016142), Citrate synthase, type II (InterPro:IPR010953), Citrate synthase-like …	0.859722	1.20649e-25	0.961736	7.12499e-48
Solyc07g042090.4.1	ME10	1	Protein LAZ1-like protein 2 (AHRD V3.3 *** A0A2G3BYI1_CAPCH)	AT1G23070.1	67.36	0	543	Protein of unknown function (DUF300)	0	Protein of unknown function (DUF300); CONTAINS InterPro DOMAIN/s: Protein of unknown function DUF300 (InterPro:IPR005178); BEST Arabidopsis thaliana protein match is: Protein of unknown function (DUF300) (TAIR:AT4G38360.2); Has 840 Blast hits to 837 proteins in 189 species: Archae - 0; Bacteria - 0; Metazoa - 286; Fungi - 190; Plants - 245; Viruses - 0; Other Eukaryotes - 119 (source: NCBI BLink).	0.86932	8.0635e-27	0.961508	9.05265e-48	both
Solyc01g067650.2.1	ME10	1	classical arabinogalactan protein 9 isoform X1 (AHRD V3.3 --* XP_006594475.1)	NA	NA	NA	NA	NA	NA	NA	0.865062	2.74691e-26	0.961241	1.19487e-47
Solyc07g005820.3.1	ME10	1	Heat shock 70 kDa protein (AHRD V3.3 *** A0A2G2WB37_CAPBA)	AT1G16030.1	83.62	0	1130	heat shock protein 70B	0	heat shock protein 70B (Hsp70b); FUNCTIONS IN: ATP binding; INVOLVED IN: protein folding, response to heat; LOCATED IN: cytosol, cell wall, plasma membrane, chloroplast, membrane; EXPRESSED IN: 19 plant structures; EXPRESSED DURING: 10 growth stages; CONTAINS InterPro DOMAIN/s: Heat shock protein 70, conserved site (InterPro:IPR018181), Heat shock protein Hsp70 (InterPro:IPR001023), Heat shock pr…	0.943751	3.60731e-41	0.960434	2.73967e-47	both
Solyc03g058330.3.1	ME10	1	18 kDa seed maturation protein-like (AHRD V3.3 *** XP_004234770.1)	NA	NA	NA	NA	NA	NA	NA	0.745674	4.06125e-16	0.960292	3.16293e-47
Solyc01g098950.3.1	ME10	1	Glyceraldehyde-3-phosphate dehydrogenase (AHRD V3.3 *** A0A2G3C9S8_CAPCH)	AT3G04120.1	86.75	1e-143	412	glyceraldehyde-3-phosphate dehydrogenase C subunit 1	encodes cytosolic GADPH (C subunit) involved in the glycolytic pathway but also interacts with H2O2 potentially placing it in a signalling cascade induced by ROS.	glyceraldehyde-3-phosphate dehydrogenase C subunit 1 (GAPC1); FUNCTIONS IN: glyceraldehyde-3-phosphate dehydrogenase (phosphorylating) activity, copper ion binding, glyceraldehyde-3-phosphate dehydrogenase activity; INVOLVED IN: in 11 processes; LOCATED IN: in 8 components; EXPRESSED IN: 28 plant structures; EXPRESSED DURING: 16 growth stages; CONTAINS InterPro DOMAIN/s: Glyceraldehyde 3-phosphat…	0.83045	1.54248e-22	0.95975	5.45437e-47	gonzalez
Solyc06g068690.4.1	ME10	1	Amidase family protein (AHRD V3.3 *-* AT5G07360.3)	AT5G07360.2	73.08	3e-142	418	Amidase family protein	0	Amidase family protein; FUNCTIONS IN: amidase activity, carbon-nitrogen ligase activity, with glutamine as amido-N-donor; EXPRESSED IN: 22 plant structures; EXPRESSED DURING: 13 growth stages; CONTAINS InterPro DOMAIN/s: Amidase (InterPro:IPR000120); BEST Arabidopsis thaliana protein match is: Amidase family protein (TAIR:AT3G25660.1); Has 19044 Blast hits to 19036 proteins in 2473 species: Archa…	0.780653	2.03298e-18	0.959423	7.54745e-47	both
Solyc07g040680.3.1	ME10	1	Heat shock transcription factor (AHRD V3.3 *-* A0A1Y1I763_KLENI)	AT2G26150.4	48.88	1e-79	251	NA	NA	NA	0.788675	5.25439e-19	0.958993	1.15297e-46	both
Solyc02g085150.4.1	ME10	1	Late embryogenesis abundant (LEA) protein (AHRD V3.3 *** A0A1P8B7I6_ARATH)	AT4G36600.2	33.02	9e-24	101	NA	NA	NA	0.758796	6.18679e-17	0.958726	1.49675e-46
Solyc10g078770.2.1	ME10	1	11 kDa late embryogenesis abundant protein (AHRD V3.3 *-* A0A2G3BHR7_CAPCH)	NA	NA	NA	NA	NA	NA	NA	0.859492	1.28386e-25	0.957902	3.31124e-46
Solyc04g015200.3.1	ME10	1	ATP-dependent 6-phosphofructokinase (AHRD V3.3 *** A0A2G3CDP5_CAPCH)	AT5G47810.1	76.87	0	691	phosphofructokinase 2	0	phosphofructokinase 2 (PFK2); CONTAINS InterPro DOMAIN/s: Pyrophosphate-dependent phosphofructokinase TP0108 (InterPro:IPR012004), Phosphofructokinase (InterPro:IPR000023); BEST Arabidopsis thaliana protein match is: phosphofructokinase 3 (TAIR:AT4G26270.1); Has 1807 Blast hits to 1807 proteins in 277 species: Archae - 0; Bacteria - 0; Metazoa - 736; Fungi - 347; Plants - 385; Viruses - 0; Other …	0.783977	1.16855e-18	0.957838	3.51917e-46	both
Solyc03g005947.1.1	ME10	1	protein NRT1/ PTR FAMILY 4.4 (AHRD V3.3 *-* A0A2I4FR99_9ROSI)	AT1G59740.1	56.58	2e-24	97.1	Major facilitator superfamily protein	0	Major facilitator superfamily protein; FUNCTIONS IN: transporter activity; INVOLVED IN: oligopeptide transport, response to nematode; LOCATED IN: plasma membrane, membrane; EXPRESSED IN: 19 plant structures; EXPRESSED DURING: 10 growth stages; CONTAINS InterPro DOMAIN/s: PTR2 family proton/oligopeptide symporter, conserved site (InterPro:IPR018456), Oligopeptide transporter (InterPro:IPR000109), …	0.886634	3.40054e-29	0.957639	4.25286e-46
Solyc04g055020.2.1	ME10	1	Succinate dehydrogenase [ubiquinone] iron-sulfur subunit, mitochondrial (AHRD V3.3 *** A0A2G2XLC0_CAPBA)	AT5G65165.1	75.45	7e-156	442	succinate dehydrogenase 2-3	One of three isoforms of the iron-sulfur component of the succinate dehydrogenase complex, a component of the mitochondrial respiratory chain complex II. The product of the nuclear encoded gene is imported into the mitochondrion. Transcripts appear during seed maturation, persist through dessication, are abundant in dry seeds, and markedly decline during germination.	succinate dehydrogenase 2-3 (SDH2-3); CONTAINS InterPro DOMAIN/s: Ferredoxin (InterPro:IPR001041), Beta-grasp fold, ferredoxin-type (InterPro:IPR012675), Fumarate reductase, C-terminal (InterPro:IPR012285), 2Fe-2S ferredoxin, iron-sulphur binding site (InterPro:IPR006058), 4Fe-4S ferredoxin, iron-sulpur binding domain (InterPro:IPR017896), 4Fe-4S ferredoxin, iron-sulphur binding, conserved site (…	0.786223	7.99482e-19	0.957569	4.5441e-46
Solyc09g074660.3.1	ME10	1	spermatogenesis-associated protein 20 (AHRD V3.3 *** A0A2I4GIU1_9ROSI)	AT4G03200.1	72.74	0	1187	catalytics	0	catalytics; FUNCTIONS IN: catalytic activity; LOCATED IN: chloroplast; EXPRESSED IN: 24 plant structures; EXPRESSED DURING: 13 growth stages; CONTAINS InterPro DOMAIN/s: Protein of unknown function DUF255 (InterPro:IPR004879), Thioredoxin fold (InterPro:IPR012335), Six-hairpin glycosidase-like (InterPro:IPR008928), Thioredoxin-like fold (InterPro:IPR012336); Has 2655 Blast hits to 2648 proteins i…	0.906834	1.64953e-32	0.957359	5.54062e-46	both
Solyc07g005210.3.1	ME10	1	Outer membrane lipoprotein blc-like (AHRD V3.3 *** A0A2K3KEW8_TRIPR)	AT5G58070.1	77.47	2e-104	302	temperature-induced lipocalin	Encodes a temperature-induced lipocalin TIL1. Involved in thermotolerance. Peripherally associated with plasma membrane.	temperature-induced lipocalin (TIL); FUNCTIONS IN: binding, transporter activity; INVOLVED IN: transport, response to cold, response to light stimulus, response to heat; LOCATED IN: mitochondrion, endoplasmic reticulum, plasma membrane, vacuole; EXPRESSED IN: 26 plant structures; EXPRESSED DURING: 17 growth stages; CONTAINS InterPro DOMAIN/s: Lipocalin, bacterial (InterPro:IPR002446), Lipocalin, …	0.842705	9.22367e-24	0.95728	5.9668e-46	terrasson
Solyc06g075990.4.1	ME10	1	Glyoxalase-like domain (AHRD V3.3 *** A0A200R6M5_9MAGN),Pfam:PF18029	AT1G07645.1	73.33	6e-71	213	dessication-induced 1VOC superfamily protein	0	dessication-induced 1VOC superfamily protein (DSI-1VOC); FUNCTIONS IN: catalytic activity; LOCATED IN: endomembrane system; EXPRESSED IN: seed; CONTAINS InterPro DOMAIN/s: Glyoxalase/bleomycin resistance protein/dioxygenase (InterPro:IPR004360); Has 35333 Blast hits to 34131 proteins in 2444 species: Archae - 798; Bacteria - 22429; Metazoa - 974; Fungi - 991; Plants - 531; Viruses - 0; Other Euka…	0.812733	6.21979e-21	0.956831	9.08067e-46	terrasson
Solyc05g024160.3.1	ME10	1	Pyruvate dehydrogenase E1 component subunit beta (AHRD V3.3 *** A0A1U8ENS4_CAPAN)	AT5G50850.1	78.31	0	582	Transketolase family protein	0	MACCI-BOU (MAB1); FUNCTIONS IN: pyruvate dehydrogenase (acetyl-transferring) activity, catalytic activity; INVOLVED IN: defense response to bacterium; LOCATED IN: mitochondrion, nucleolus, plasma membrane; EXPRESSED IN: 25 plant structures; EXPRESSED DURING: 17 growth stages; CONTAINS InterPro DOMAIN/s: Transketolase, C-terminal (InterPro:IPR005476), Transketolase-like, C-terminal (InterPro:IPR01…	0.789802	4.32385e-19	0.95628	1.51115e-45
Solyc09g005060.3.1	ME10	1	Phosphatidylethanolamine-binding protein PEBP (AHRD V3.3 *** A0A200PX07_9MAGN)	AT5G01300.1	61.25	2e-71	216	PEBP (phosphatidylethanolamine-binding protein) family protein	0	PEBP (phosphatidylethanolamine-binding protein) family protein; FUNCTIONS IN: phosphatidylethanolamine binding; INVOLVED IN: biological_process unknown; LOCATED IN: cellular_component unknown; EXPRESSED IN: 7 plant structures; EXPRESSED DURING: LP.04 four leaves visible, 4 anthesis, 4 leaf senescence stage, petal differentiation and expansion stage, LP.08 eight leaves visible; CONTAINS InterPro D…	0.847178	3.10624e-24	0.955971	2.00432e-45	both	1
Solyc05g009240.3.1	ME10	1	DUF639 domain-containing protein (AHRD V3.3 *** A0A1Q3DGQ0_CEPFO)	AT2G21720.1	59.07	0	808	Plant protein of unknown function (DUF639)	0	Plant protein of unknown function (DUF639); CONTAINS InterPro DOMAIN/s: Protein of unknown function DUF639 (InterPro:IPR006927); BEST Arabidopsis thaliana protein match is: Plant protein of unknown function (DUF639) (TAIR:AT5G23390.1); Has 146 Blast hits to 143 proteins in 14 species: Archae - 0; Bacteria - 4; Metazoa - 0; Fungi - 0; Plants - 142; Viruses - 0; Other Eukaryotes - 0 (source: NCBI B…	0.841805	1.1435e-23	0.955785	2.37271e-45	terrasson
Solyc01g105220.3.1	ME10	1	alternative oxidase 2	AT5G64210.1	72.91	1e-156	448	alternative oxidase 2	encodes an isoform of alternative oxidase, which is expressed in rosettes, stems, and roots. Transcript accumulates in dry seeds and decreased upon germination and is not affected by actinomycin A. Protein is localized to mitochondria.	alternative oxidase 2 (AOX2); CONTAINS InterPro DOMAIN/s: Alternative oxidase (InterPro:IPR002680); BEST Arabidopsis thaliana protein match is: alternative oxidase 1A (TAIR:AT3G22370.1); Has 1305 Blast hits to 1305 proteins in 244 species: Archae - 0; Bacteria - 111; Metazoa - 12; Fungi - 191; Plants - 373; Viruses - 0; Other Eukaryotes - 618 (source: NCBI BLink).	0.923964	5.63574e-36	0.954632	6.66254e-45	gonzalez
Solyc02g077440.3.1	ME10	0	Transcription elongation factor 1 homolog (AHRD V3.3 *** A0A1U8FVQ1_CAPAN)	AT5G46030.3	82.93	3e-47	150	NA	NA	NA	0.807647	1.67299e-20	0.954347	8.56704e-45
Solyc03g034030.3.1	ME10	0	Plant Late Embryo Abundant (LEA) related (AHRD V3.3 *-* F5GUH5_CAEEL)	NA	NA	NA	NA	NA	NA	NA	0.868435	1.04401e-26	0.953682	1.52947e-44
Solyc04g056380.3.1	ME10	1	seipin-1 (AHRD V3.3 *** A0A2I4DXK6_9ROSI)	AT5G16460.1	43.49	4e-92	286	Putative adipose-regulatory protein (Seipin)	0	Putative adipose-regulatory protein (Seipin); CONTAINS InterPro DOMAIN/s: Adipose-regulatory protein, Seipin (InterPro:IPR009617); BEST Arabidopsis thaliana protein match is: Putative adipose-regulatory protein (Seipin) (TAIR:AT2G34380.1); Has 1807 Blast hits to 1807 proteins in 277 species: Archae - 0; Bacteria - 0; Metazoa - 736; Fungi - 347; Plants - 385; Viruses - 0; Other Eukaryotes - 339 (s…	0.787601	6.31849e-19	0.953404	1.9433e-44	both	1
Solyc09g074910.1.1	ME10	0	Peripheral-type benzodiazepine receptor (AHRD V3.3 *** Q6A151_SOLTU)	AT2G47770.1	45.21	9e-52	169	TSPO(outer membrane tryptophan-rich sensory protein)-related	Encodes a membrane-bound protein designated AtTSPO (Arabidopsis thaliana TSPO-related). AtTSPO is related to the bacterial outer membrane tryptophan-rich sensory protein (TspO) and the mammalian mitochondrial 18 kDa Translocator Protein (18 kDa TSPO), members of the TspO/MBR domain-containing membrane proteins. Mainly detected in dry seeds, but can be induced in vegetative tissues by osmotic or s…	TSPO(outer membrane tryptophan-rich sensory protein)-related (TSPO); CONTAINS InterPro DOMAIN/s: TspO/MBR-related protein (InterPro:IPR004307); Has 567 Blast hits to 567 proteins in 188 species: Archae - 24; Bacteria - 226; Metazoa - 151; Fungi - 6; Plants - 53; Viruses - 0; Other Eukaryotes - 107 (source: NCBI BLink).	0.87652	9.17097e-28	0.952563	3.98026e-44	both	1
Solyc06g065050.2.1	ME10	1	Late embryogenesis abundant domain-containing protein / LEA domain-containing protein (AHRD V3.3 *** Q9C7H3_ARATH)	AT1G72100.1	31.2	3e-64	218	late embryogenesis abundant domain-containing protein / LEA domain-containing protein	0	late embryogenesis abundant domain-containing protein / LEA domain-containing protein; INVOLVED IN: embryo development ending in seed dormancy; LOCATED IN: endomembrane system; EXPRESSED IN: sperm cell; CONTAINS InterPro DOMAIN/s: Late embryogenesis abundant protein, group 4 (InterPro:IPR004238); BEST Arabidopsis thaliana protein match is: Late embryogenesis abundant protein (LEA) family protein …	0.756124	9.16238e-17	0.95248	4.27042e-44	both	1
Solyc10g009170.2.1	ME10	1	Lysine ketoglutarate reductase trans-splicing-like protein (DUF707) (AHRD V3.3 *** A0A1P8AQH7_ARATH)	AT1G11170.7	61.13	4e-174	498	NA	NA	NA	0.746766	3.48772e-16	0.95129	1.14924e-43
Solyc10g083380.2.1	ME10	1	Basic-leucine zipper (BZIP) transcription factor family protein (AHRD V3.3 *-* Q8L5Y2_ARATH)	NA	NA	NA	NA	NA	NA	NA	0.921133	2.38292e-35	0.951151	1.2884e-43
Solyc04g049960.3.1	ME10	1	Low temperature and salt responsive protein family (AHRD V3.3 *** A0A2U1QNE0_ARTAN)	AT2G38905.1	94.44	9e-29	99.8	Low temperature and salt responsive protein family	0	Low temperature and salt responsive protein family; INVOLVED IN: response to cold, hyperosmotic salinity response; LOCATED IN: endomembrane system, integral to membrane; EXPRESSED IN: 10 plant structures; EXPRESSED DURING: M germinated pollen stage, 4 anthesis, petal differentiation and expansion stage; CONTAINS InterPro DOMAIN/s: Uncharacterised protein family UPF0057 (InterPro:IPR000612); BEST …	0.75637	8.83937e-17	0.950346	2.47805e-43
Solyc08g082260.2.1	ME10	1	Protein phosphatase 2C (AHRD V3.3 *** A0A2U1KYU0_ARTAN)	AT1G07430.1	39.82	3e-75	244	highly ABA-induced PP2C gene 2	0	highly ABA-induced PP2C gene 2 (HAI2); FUNCTIONS IN: protein serine/threonine phosphatase activity, catalytic activity; INVOLVED IN: protein amino acid dephosphorylation; LOCATED IN: protein serine/threonine phosphatase complex; EXPRESSED IN: 17 plant structures; EXPRESSED DURING: 9 growth stages; CONTAINS InterPro DOMAIN/s: Protein phosphatase 2C, manganese/magnesium aspartate binding site (Inte…	0.9206	3.10651e-35	0.949963	3.36997e-43
Solyc04g072470.4.1	ME10	1	defensin Tk-AMP-D6-like (AHRD V3.3 *** A0A1U8GDD3_CAPAN)	NA	NA	NA	NA	NA	NA	NA	0.868291	1.08862e-26	0.949874	3.61606e-43
Solyc09g075600.3.1	ME10	1	GATA transcription factor-like protein (AHRD V3.3 *-* AT1G02700.1)	NA	NA	NA	NA	NA	NA	NA	0.75225	1.60488e-16	0.949868	3.63325e-43
Solyc04g078450.4.1	ME10	1	Unknown protein	NA	NA	NA	NA	NA	NA	NA	0.888338	1.89282e-29	0.949736	4.03654e-43
Solyc01g098860.3.1	ME10	1	Glycoprotein membrane GPI-anchored (AHRD V3.3 *** A0A2U1LIH4_ARTAN)	AT1G54860.1	49.07	4e-48	159	Glycoprotein membrane precursor GPI-anchored	0	Glycoprotein membrane precursor GPI-anchored; BEST Arabidopsis thaliana protein match is: Glycoprotein membrane precursor GPI-anchored (TAIR:AT3G06035.1); Has 83 Blast hits to 82 proteins in 14 species: Archae - 0; Bacteria - 0; Metazoa - 0; Fungi - 0; Plants - 83; Viruses - 0; Other Eukaryotes - 0 (source: NCBI BLink).	0.755237	1.04271e-16	0.949476	4.96422e-43	both	1
Solyc05g015890.4.1	ME10	1	transmembrane protein (AHRD V3.3 *** AT1G27990.1)	AT1G27990.1	63.14	7e-115	335	0	0	unknown protein; BEST Arabidopsis thaliana protein match is: unknown protein (TAIR:AT5G52420.1); Has 86 Blast hits to 86 proteins in 15 species: Archae - 0; Bacteria - 0; Metazoa - 0; Fungi - 0; Plants - 84; Viruses - 0; Other Eukaryotes - 2 (source: NCBI BLink).	0.745625	4.08895e-16	0.949329	5.57311e-43	both	1
Solyc04g007920.1.1	ME10	1	B-cell receptor-associated-like protein (AHRD V3.3 *** Q9FFJ0_ARATH)	AT5G17190.1	75.57	6e-72	215	0	0	FUNCTIONS IN: molecular_function unknown; INVOLVED IN: intracellular protein transport; LOCATED IN: endomembrane system, integral to membrane, endoplasmic reticulum; EXPRESSED IN: 23 plant structures; EXPRESSED DURING: 13 growth stages; CONTAINS InterPro DOMAIN/s: B-cell receptor-associated 31-like (InterPro:IPR008417); BEST Arabidopsis thaliana protein match is: unknown protein (TAIR:AT3G03160.1…	0.795027	1.72509e-19	0.949114	6.60114e-43	gonzalez
Solyc03g005290.2.1	ME10	1	swi5-dependent recombination D repair protein 1 homolog isoform X1 (AHRD V3.3 *-* XP_010317398.1)	NA	NA	NA	NA	NA	NA	NA	0.750674	2.0102e-16	0.948848	8.13246e-43
Solyc05g012770.3.1	ME10	1	WRKY transcription factor 4	AT1G13960.1	54.13	4e-161	472	WRKY DNA-binding protein 4	Encodes WRKY DNA-binding protein 4 (WRKY4).	WRKY DNA-binding protein 4 (WRKY4); FUNCTIONS IN: DNA binding, sequence-specific DNA binding transcription factor activity; INVOLVED IN: regulation of transcription, DNA-dependent; LOCATED IN: chloroplast; EXPRESSED IN: 22 plant structures; EXPRESSED DURING: 10 growth stages; CONTAINS InterPro DOMAIN/s: DNA-binding WRKY (InterPro:IPR003657); BEST Arabidopsis thaliana protein match is: WRKY DNA-bi…	0.903351	6.91837e-32	0.948163	1.38368e-42	gonzalez
Solyc06g068540.3.1	ME10	1	ATP-dependent D helicase (AHRD V3.3 *** Q9ZUI1_ARATH)	AT2G24100.1	45.81	2e-128	387	0	0	unknown protein; BEST Arabidopsis thaliana protein match is: unknown protein (TAIR:AT4G30780.1); Has 101 Blast hits to 101 proteins in 16 species: Archae - 0; Bacteria - 0; Metazoa - 0; Fungi - 0; Plants - 95; Viruses - 0; Other Eukaryotes - 6 (source: NCBI BLink).	0.78554	8.97782e-19	0.946934	3.52879e-42	terrasson
Solyc11g045350.2.1	ME10	1	Plant regulator RWP-RK family protein (AHRD V3.3 *** G7IS09_MEDTR)	AT2G43500.9	49.39	0	843	NA	NA	NA	0.879812	3.24231e-28	0.945903	7.6073e-42
Solyc10g083370.1.1	ME10	1	Unknown protein	NA	NA	NA	NA	NA	NA	NA	0.898374	4.89566e-31	0.945687	8.91922e-42
Solyc02g071770.3.1	ME10	1	oil body-associated protein 2A-like (AHRD V3.3 *** A0A2I4FEE8_9ROSI)	AT5G45690.1	63.71	6e-114	331	Protein of unknown function (DUF1264)	0	Protein of unknown function (DUF1264); FUNCTIONS IN: molecular_function unknown; INVOLVED IN: biological_process unknown; LOCATED IN: cellular_component unknown; EXPRESSED IN: seed, leaf; EXPRESSED DURING: seedling growth; CONTAINS InterPro DOMAIN/s: Protein of unknown function DUF1264 (InterPro:IPR010686); BEST Arabidopsis thaliana protein match is: Protein of unknown function (DUF1264) (TAIR:AT…	0.732791	2.31142e-15	0.945002	1.47049e-41	both	1
Solyc01g087180.4.1	ME10	1	Expressed protein (AHRD V3.3 *-* AT1G07985.1)	NA	NA	NA	NA	NA	NA	NA	0.947416	2.45058e-42	0.942675	7.6754e-41
Solyc01g100830.2.1	ME10	0	galactinol synthase 1	AT2G47180.1	62.11	5e-141	407	galactinol synthase 1	0	galactinol synthase 1 (GolS1); FUNCTIONS IN: transferase activity, transferring hexosyl groups, transferase activity, transferring glycosyl groups; INVOLVED IN: response to high light intensity, carbohydrate biosynthetic process, response to hydrogen peroxide, response to heat; LOCATED IN: cellular_component unknown; EXPRESSED IN: 19 plant structures; EXPRESSED DURING: 11 growth stages; CONTAINS …	0.816041	3.21451e-21	0.942201	1.06577e-40	both
Solyc08g067270.3.1	ME10	1	hydroxyproline-rich glycoprotein family protein (AHRD V3.3 *-* AT5G21280.1)	NA	NA	NA	NA	NA	NA	NA	0.876917	8.10262e-28	0.940944	2.51054e-40
Solyc10g017540.4.1	ME10	1	Remorin (AHRD V3.3 *** A0A1U8DSP8_CAPAN)	AT5G23750.3	60.32	7e-46	154	NA	NA	NA	0.940084	4.46318e-40	0.940375	3.67752e-40
Solyc07g063320.3.1	ME10	1	LanC-like protein GCR2 (AHRD V3.3 *** A0A2G3C294_CAPCH)	AT1G52920.1	60.68	4e-177	505	G protein coupled receptor	Encodes a plasma membranelocalized ABA receptor, which interacts with the G&#945;&#946;&#947; complex. It has been postulated that the binding of ABA to GCR2 results in the release of the G protein and dissociation of the heterotrimeric complex into G&#945; and the G&#946;&#947; dimer to activate downstream ABA effectors and to trigger the ABA responses.	G protein coupled receptor (GPCR); CONTAINS InterPro DOMAIN/s: LanC-like protein, eukaryotic (InterPro:IPR020464), Six-hairpin glycosidase-like (InterPro:IPR008928), Lanthionine synthetase C-like (InterPro:IPR007822); BEST Arabidopsis thaliana protein match is: GCR2-like 2 (TAIR:AT2G20770.1); Has 681 Blast hits to 670 proteins in 211 species: Archae - 0; Bacteria - 184; Metazoa - 280; Fungi - 66;…	0.933599	2.64893e-38	0.940342	3.75892e-40
Solyc02g077970.4.1	ME10	1	Late embryogenesis abundant protein (AHRD V3.3 *** A0A200PQ87_9MAGN)	AT5G44310.2	30.75	3e-28	112	Late embryogenesis abundant protein (LEA) family protein	0	Late embryogenesis abundant protein (LEA) family protein; INVOLVED IN: embryo development ending in seed dormancy; EXPRESSED IN: cotyledon; BEST Arabidopsis thaliana protein match is: Late embryogenesis abundant protein (LEA) family protein (TAIR:AT4G21020.1); Has 48356 Blast hits to 24924 proteins in 2440 species: Archae - 556; Bacteria - 15482; Metazoa - 11997; Fungi - 3418; Plants - 3641; Viru…	0.736422	1.43048e-15	0.939647	5.96172e-40
Solyc02g077530.2.1	ME10	0	O-methyltransferase (AHRD V3.3 *** A0A2S1PVB3_CAMAC)	AT4G35160.1	35.75	5e-64	212	O-methyltransferase family protein	0	O-methyltransferase family protein; FUNCTIONS IN: methyltransferase activity, O-methyltransferase activity, protein dimerization activity; LOCATED IN: cytosol; CONTAINS InterPro DOMAIN/s: Winged helix-turn-helix transcription repressor DNA-binding (InterPro:IPR011991), Plant methyltransferase dimerisation (InterPro:IPR012967), O-methyltransferase, family 2 (InterPro:IPR001077), O-methyltransferas…	0.916422	2.33677e-34	0.939284	7.56991e-40	terrasson
Solyc09g014750.1.1	ME10	1	Late embryogenesis abundant protein (AHRD V3.3 *** W0FHP9_9CARY)	AT3G51810.2	77.27	3e-41	135	NA	NA	NA	0.778938	2.69519e-18	0.938877	9.86929e-40
Solyc03g111100.1.1	ME10	1	At3g48510 (AHRD V3.3 *** Q9SMP6_ARATH)	AT5G50360.1	43.64	7e-66	212	0	0	unknown protein; BEST Arabidopsis thaliana protein match is: unknown protein (TAIR:AT3G48510.1); Has 1807 Blast hits to 1807 proteins in 277 species: Archae - 0; Bacteria - 0; Metazoa - 736; Fungi - 347; Plants - 385; Viruses - 0; Other Eukaryotes - 339 (source: NCBI BLink).	0.712883	2.81233e-14	0.938287	1.44675e-39	terrasson
Solyc01g088010.1.1	ME10	1	Lactoylglutathione lyase (AHRD V3.3 *** B6UH06_MAIZE)	AT2G28420.1	70.35	7e-84	252	Lactoylglutathione lyase / glyoxalase I family protein	0	Lactoylglutathione lyase / glyoxalase I family protein; CONTAINS InterPro DOMAIN/s: Glyoxalase/bleomycin resistance protein/dioxygenase (InterPro:IPR004360); BEST Arabidopsis thaliana protein match is: Lactoylglutathione lyase / glyoxalase I family protein (TAIR:AT1G80160.1); Has 1054 Blast hits to 1054 proteins in 326 species: Archae - 2; Bacteria - 538; Metazoa - 105; Fungi - 6; Plants - 229; V…	0.754965	1.08476e-16	0.936913	3.47129e-39	both	1
Solyc08g076880.3.1	ME10	1	Succinate dehydrogenase [ubiquinone] iron-sulfur subunit, mitochondrial (AHRD V3.3 *-* A0A2G2XLC0_CAPBA)	NA	NA	NA	NA	NA	NA	NA	0.807712	1.65223e-20	0.93684	3.63366e-39
Solyc08g063035.1.1	ME10	1	DDT domain-containing protein DDB_G0282237 (AHRD V3.3 --* XP_010321301.1)	NA	NA	NA	NA	NA	NA	NA	0.812079	7.07451e-21	0.936695	3.97963e-39
Solyc11g022530.3.1	ME10	1	Late embryogenesis abundant domain-containing protein / LEA domain-containing protein (AHRD V3.3 *-* Q9C7H3_ARATH)	AT1G22600.1	33.51	5e-62	208	Late embryogenesis abundant protein (LEA) family protein	0	Late embryogenesis abundant protein (LEA) family protein; FUNCTIONS IN: molecular_function unknown; INVOLVED IN: biological_process unknown; LOCATED IN: endomembrane system; EXPRESSED IN: stem, embryo, sperm cell, hypocotyl, flower; EXPRESSED DURING: petal differentiation and expansion stage, D bilateral stage; BEST Arabidopsis thaliana protein match is: late embryogenesis abundant domain-contain…	0.843526	7.57323e-24	0.935518	8.26939e-39	gonzalez
Solyc09g090800.2.1	ME10	1	AWPM-19-like family protein (AHRD V3.3 *** O23029_ARATH)	AT1G04560.1	67.72	1e-89	265	AWPM-19-like family protein	0	AWPM-19-like family protein; FUNCTIONS IN: molecular_function unknown; INVOLVED IN: biological_process unknown; LOCATED IN: endomembrane system; CONTAINS InterPro DOMAIN/s: AWPM-19-like (InterPro:IPR008390); BEST Arabidopsis thaliana protein match is: AWPM-19-like family protein (TAIR:AT5G46530.1); Has 177 Blast hits to 177 proteins in 19 species: Archae - 0; Bacteria - 0; Metazoa - 0; Fungi - 0;…	0.821457	1.05988e-21	0.932972	3.8439e-38	both	1
Solyc06g065073.1.1	ME10	1	Proteinase inhibitor type-2 (AHRD V3.3 *-* A0A2G2XU31_CAPAN)	NA	NA	NA	NA	NA	NA	NA	0.890721	8.2095e-30	0.932902	4.0075e-38
Solyc11g067250.3.1	ME10	1	Poly [ADP-ribose] polymerase (AHRD V3.3 *** A0A2G2Y1R0_CAPAN)	AT5G22470.1	63.65	0	1109	NAD+ ADP-ribosyltransferases;NAD+ ADP-ribosyltransferases	0	NAD+ ADP-ribosyltransferases;NAD+ ADP-ribosyltransferases; FUNCTIONS IN: NAD+ ADP-ribosyltransferase activity; INVOLVED IN: protein amino acid ADP-ribosylation; LOCATED IN: intracellular, nucleus; CONTAINS InterPro DOMAIN/s: WGR (InterPro:IPR008893), Poly(ADP-ribose) polymerase, regulatory domain (InterPro:IPR004102), PADR1 (InterPro:IPR012982), Poly(ADP-ribose) polymerase, catalytic domain (Inte…	0.818424	1.98192e-21	0.932119	6.34483e-38	both	1
Solyc06g075520.3.1	ME10	1	Glutathione S-transferase (AHRD V3.3 *** A0A200PZB1_9MAGN)	AT1G75270.1	65.79	2e-29	108	dehydroascorbate reductase 2	0	dehydroascorbate reductase 2 (DHAR2); FUNCTIONS IN: glutathione binding, glutathione dehydrogenase (ascorbate) activity; INVOLVED IN: protein amino acid glutathionylation; LOCATED IN: plasma membrane; EXPRESSED IN: 25 plant structures; EXPRESSED DURING: 16 growth stages; CONTAINS InterPro DOMAIN/s: Thioredoxin fold (InterPro:IPR012335), Glutathione S-transferase, C-terminal-like (InterPro:IPR0109…	0.806588	2.04826e-20	0.931959	6.96575e-38
Solyc10g082064.1.1	ME10	1	furry (AHRD V3.3 *** AT5G08060.1)	AT5G08060.1	60.16	7e-54	170	0	0	unknown protein; FUNCTIONS IN: molecular_function unknown; INVOLVED IN: biological_process unknown; LOCATED IN: mitochondrion; EXPRESSED IN: 24 plant structures; EXPRESSED DURING: 16 growth stages; Has 42 Blast hits to 42 proteins in 17 species: Archae - 0; Bacteria - 0; Metazoa - 0; Fungi - 0; Plants - 41; Viruses - 0; Other Eukaryotes - 1 (source: NCBI BLink).	0.853185	6.80715e-25	0.931909	7.17082e-38
Solyc09g059670.4.1	ME10	1	Alpha/beta hydrolase family protein (AHRD V3.3 *** Q8RX69_ARATH)	AT1G15060.3	61.76	0	674	NA	NA	NA	0.80324	3.85214e-20	0.931524	8.96845e-38
Solyc11g006750.1.1	ME10	0	F1F0-ATPase inhibitor protein (AHRD V3.3 --* AT5G04750.1)	NA	NA	NA	NA	NA	NA	NA	0.824169	5.99618e-22	0.93067	1.46483e-37
Solyc09g098120.3.1	ME10	1	DUF1264 domain-containing protein (AHRD V3.3 *** A0A1Q3BQQ5_CEPFO)	AT1G05510.1	69.87	3e-128	367	Protein of unknown function (DUF1264)	Protein is tyrosine-phosphorylated and its phosphorylation state is modulated in response to ABA in Arabidopsis thaliana seeds.	FUNCTIONS IN: molecular_function unknown; INVOLVED IN: response to abscisic acid stimulus; LOCATED IN: cellular_component unknown; EXPRESSED IN: seed; EXPRESSED DURING: seedling growth, seed development stages; CONTAINS InterPro DOMAIN/s: Protein of unknown function DUF1264 (InterPro:IPR010686); BEST Arabidopsis thaliana protein match is: Protein of unknown function (DUF1264) (TAIR:AT2G31985.1); …	0.747147	3.3065e-16	0.930632	1.49711e-37	both	1
Solyc04g064710.3.1	ME10	1	Alcohol dehydrogenase (AHRD V3.3 *** Q42953_TOBAC)	AT1G77120.1	84.92	0	684	alcohol dehydrogenase 1	Catalyzes the reduction of acetaldehyde using NADH as reductant. Requires zinc for activity. Dimer. Anaerobic response polypeptide (ANP). Fermentation. The protein undergoes thiolation following treatment with the oxidant tert-butylhydroperoxide.	alcohol dehydrogenase 1 (ADH1); FUNCTIONS IN: alcohol dehydrogenase (NAD) activity; INVOLVED IN: response to cadmium ion, cellular respiration, response to salt stress, response to hypoxia, response to osmotic stress; LOCATED IN: cytosol, plasma membrane; EXPRESSED IN: 24 plant structures; EXPRESSED DURING: 12 growth stages; CONTAINS InterPro DOMAIN/s: GroES-like (InterPro:IPR011032), Alcohol deh…	0.720624	1.09203e-14	0.930208	1.90582e-37
Solyc04g081230.3.1	ME10	0	TLD-domain containing nucleolar protein (AHRD V3.3 *** A0A2U1P606_ARTAN)	AT5G39590.1	53.59	0	598	TLD-domain containing nucleolar protein	0	TLD-domain containing nucleolar protein; FUNCTIONS IN: molecular_function unknown; INVOLVED IN: N-terminal protein myristoylation; LOCATED IN: cellular_component unknown; EXPRESSED IN: 24 plant structures; EXPRESSED DURING: 15 growth stages; CONTAINS InterPro DOMAIN/s: TLDc (InterPro:IPR006571); Has 191 Blast hits to 191 proteins in 77 species: Archae - 0; Bacteria - 0; Metazoa - 80; Fungi - 11; …	0.696152	1.96174e-13	0.928271	5.631e-37	terrasson
Solyc06g072670.3.1	ME10	1	Hydroxysteroid dehydrogenase (AHRD V3.3 *** Q2R3W3_ORYSJ)	AT5G50700.1	63.61	2e-160	457	hydroxysteroid dehydrogenase 1	Encodes a hydroxysteroid dehydrogenase HSD1. Two copies of HSD1 (At5g50600 and At5g50700) exist in the Arabidopsis genome as a result of an exact 33-kb duplication on chromosome 5 encompassing seven genes. There are five homologs of HSD1 in Arabidopsis (HSD2-At3g47350, HSD3-At3g47360, HSD4-At5g50590, HSD4-At5g50690 and HSD6-At5g50770; HSD4 has two copies due to the same gene duplication event occ…	hydroxysteroid dehydrogenase 1 (HSD1); FUNCTIONS IN: oxidoreductase activity, binding, catalytic activity; INVOLVED IN: oxidation reduction, metabolic process; LOCATED IN: endomembrane system; EXPRESSED IN: seed; CONTAINS InterPro DOMAIN/s: Short-chain dehydrogenase/reductase, conserved site (InterPro:IPR020904), NAD(P)-binding domain (InterPro:IPR016040), Glucose/ribitol dehydrogenase (InterPro:…	0.706625	5.90885e-14	0.925898	2.03788e-36	terrasson
Solyc03g118050.3.1	ME10	1	NFU1 iron-sulfur cluster protein (AHRD V3.3 *** AT5G07330.1)	AT5G07330.1	43.59	2e-39	134	0	0	unknown protein; FUNCTIONS IN: molecular_function unknown; INVOLVED IN: biological_process unknown; LOCATED IN: mitochondrion; BEST Arabidopsis thaliana protein match is: unknown protein (TAIR:AT1G63060.1); Has 1807 Blast hits to 1807 proteins in 277 species: Archae - 0; Bacteria - 0; Metazoa - 736; Fungi - 347; Plants - 385; Viruses - 0; Other Eukaryotes - 339 (source: NCBI BLink).	0.689037	4.30704e-13	0.923661	6.59535e-36	both	1
Solyc07g064860.2.1	ME10	0	Unknown protein	NA	NA	NA	NA	NA	NA	NA	0.843431	7.74785e-24	0.923104	8.78428e-36
Solyc09g015450.3.1	ME10	1	hypothetical protein (AHRD V3.3 --* AT3G51750.3)	NA	NA	NA	NA	NA	NA	NA	0.719926	1.19077e-14	0.921528	1.95531e-35
Solyc06g034410.3.1	ME10	1	DUF1442 domain-containing protein (AHRD V3.3 *** A0A1Q3BAQ3_CEPFO)	AT5G62280.1	47.44	7e-49	163	Protein of unknown function (DUF1442)	0	Protein of unknown function (DUF1442); CONTAINS InterPro DOMAIN/s: Protein of unknown function DUF1442 (InterPro:IPR009902); BEST Arabidopsis thaliana protein match is: Protein of unknown function (DUF1442) (TAIR:AT2G45360.1); Has 92 Blast hits to 92 proteins in 12 species: Archae - 0; Bacteria - 0; Metazoa - 0; Fungi - 0; Plants - 92; Viruses - 0; Other Eukaryotes - 0 (source: NCBI BLink).	0.767824	1.57919e-17	0.920015	4.14674e-35	both
Solyc11g007560.2.1	ME10	0	Bifunctional TE-E protein (AHRD V3.3 *** A0A2G3B0Y9_CAPCH)	AT3G16990.1	47.69	2e-66	208	Haem oxygenase-like, multi-helical	0	Haem oxygenase-like, multi-helical; CONTAINS InterPro DOMAIN/s: Haem oxygenase-like, multi-helical (InterPro:IPR016084), TENA/THI-4 protein/Coenzyme PQQ biosynthesis protein C (InterPro:IPR004305); Has 259 Blast hits to 259 proteins in 88 species: Archae - 23; Bacteria - 94; Metazoa - 0; Fungi - 34; Plants - 38; Viruses - 0; Other Eukaryotes - 70 (source: NCBI BLink).	0.794254	1.97985e-19	0.918696	7.89773e-35	terrasson
Solyc07g065670.1.1	ME10	0	Cellulose synthase-like protein E1 (AHRD V3.3 *-* A0A2G3C2E8_CAPCH)	NA	NA	NA	NA	NA	NA	NA	0.822052	9.36225e-22	0.918257	9.76223e-35
Solyc07g006870.4.1	ME10	0	Xyloglucan endotransglucosylase/hydrolase (AHRD V3.3 *** A0A1U8HGQ4_CAPAN)	AT5G57550.1	64.75	5e-140	401	xyloglucan endotransglucosylase/hydrolase 25	xyloglucan endotransglycosylase-related protein (XTR3)	xyloglucan endotransglucosylase/hydrolase 25 (XTH25); FUNCTIONS IN: hydrolase activity, acting on glycosyl bonds, xyloglucan:xyloglucosyl transferase activity; INVOLVED IN: plant-type cell wall biogenesis; LOCATED IN: endomembrane system, cell wall, apoplast; EXPRESSED IN: 9 plant structures; EXPRESSED DURING: 8 growth stages; CONTAINS InterPro DOMAIN/s: Xyloglucan endotransglucosylase/hydrolase …	0.870708	5.35669e-27	0.917867	1.17693e-34
Solyc03g006120.4.1	ME10	1	Transcription factor TGA like domain (AHRD V3.3 *** A0A200Q9U0_9MAGN)	AT4G18690.1	39.15	1e-59	193	0	0	unknown protein; BEST Arabidopsis thaliana protein match is: unknown protein (TAIR:AT4G18680.1); Has 522 Blast hits to 522 proteins in 39 species: Archae - 0; Bacteria - 0; Metazoa - 9; Fungi - 0; Plants - 513; Viruses - 0; Other Eukaryotes - 0 (source: NCBI BLink).	0.88482	6.27984e-29	0.917787	1.22256e-34
Solyc01g106300.3.1	ME10	1	Unknown protein	NA	NA	NA	NA	NA	NA	NA	0.817958	2.17995e-21	0.917478	1.41749e-34
Solyc03g111140.3.1	ME10	1	Malate synthase (AHRD V3.3 *** A0A1U8FXE5_CAPAN)	AT5G03860.2	83.58	0	971	malate synthase	Encodes a protein with malate synthase activity.	malate synthase (MLS); FUNCTIONS IN: malate synthase activity; INVOLVED IN: glyoxylate cycle; CONTAINS InterPro DOMAIN/s: Malate synthase-like (InterPro:IPR011076), Malate synthase, conserved site (InterPro:IPR019830), Malate synthase A (InterPro:IPR006252), Malate synthase (InterPro:IPR001465).	0.863781	3.94004e-26	0.916333	2.43586e-34	gonzalez
Solyc11g008720.3.1	ME10	1	Beta-glucosidase (AHRD V3.3 *** A0A2G2VEH4_CAPBA)	AT5G36890.1	64.59	0	662	beta glucosidase 42	0	beta glucosidase 42 (BGLU42); FUNCTIONS IN: cation binding, beta-glucosidase activity, hydrolase activity, hydrolyzing O-glycosyl compounds, catalytic activity; INVOLVED IN: cellulose catabolic process, carbohydrate metabolic process; EXPRESSED IN: 23 plant structures; EXPRESSED DURING: 13 growth stages; CONTAINS InterPro DOMAIN/s: Glycoside hydrolase, family 1, beta-glucosidase (InterPro:IPR0177…	0.841213	1.31648e-23	0.915297	3.95001e-34
Solyc03g096040.3.1	ME10	1	1-Cys peroxiredoxin (AHRD V3.3 *** A0A2I4FQD8_9ROSI)	AT1G48130.1	71.95	9e-116	333	1-cysteine peroxiredoxin 1	encodes a protein similar to the 1-cysteine (1-Cys) peroxiredoxin family of antioxidants. Expression is limited to seed (aleurone and embryo) and is not induced by ABA or drought.	1-cysteine peroxiredoxin 1 (PER1); FUNCTIONS IN: thioredoxin peroxidase activity, antioxidant activity; INVOLVED IN: maintenance of seed dormancy, response to desiccation; LOCATED IN: cellular_component unknown; EXPRESSED IN: embryo, aleurone layer, seed; EXPRESSED DURING: seed development stages; CONTAINS InterPro DOMAIN/s: Peroxiredoxin, C-terminal (InterPro:IPR019479), Thioredoxin fold (InterP…	0.726906	4.94935e-15	0.914724	5.14875e-34	both	1
Solyc04g082810.4.1	ME10	0	AT-hook motif nuclear-localized protein (AHRD V3.3 *** A0A2G3CFM3_CAPCH)	AT1G76500.1	56.3	1e-69	221	Predicted AT-hook DNA-binding family protein	Encodes an AT hook domain containing protein. Identified in a screen of activation tagged lines that suppress the long-hypocotyl phenotype of a weak phyB allele. Affects cell elongation in the hypocotyl and leaves.Acts redundantly with ESC to modulate hypocotyl growth inhibition in response to light	SUPPRESSOR OF PHYB-4#3 (SOB3); FUNCTIONS IN: DNA binding; INVOLVED IN: photomorphogenesis; LOCATED IN: cellular_component unknown; EXPRESSED IN: 10 plant structures; EXPRESSED DURING: 6 growth stages; CONTAINS InterPro DOMAIN/s: Protein of unknown function DUF296 (InterPro:IPR005175), AT hook, DNA-binding motif (InterPro:IPR017956), Predicted AT-hook DNA-binding (InterPro:IPR014476); BEST Arabido…	0.821808	9.85237e-22	0.914309	6.22945e-34
Solyc05g008490.2.1	ME10	1	Unknown protein	NA	NA	NA	NA	NA	NA	NA	0.805377	2.57724e-20	0.913821	7.78465e-34
Solyc06g050880.3.1	ME10	0	serine-rich adhesin for platelets-like isoform X1 (AHRD V3.3 --* XP_021625239.1)	NA	NA	NA	NA	NA	NA	NA	0.794965	1.74433e-19	0.911798	1.93427e-33
Solyc02g066800.3.1	ME10	1	Unknown protein	NA	NA	NA	NA	NA	NA	NA	0.843348	7.90599e-24	0.910748	3.07595e-33
Solyc12g011310.2.1	ME10	0	Glutathione S-transferase-like protein (AHRD V3.3 *** A0A2K3N2T5_TRIPR)	AT1G78380.1	65.89	3e-107	312	glutathione S-transferase TAU 19	Encodes a glutathione transferase that is a member of Tau GST gene family. Expression is induced by drought stress, oxidative stress, and high doses of auxin and cytokinin. naming convention according to Wagner et al. (2002) The expression of this gene is upregulated by herbicide safeners such as benoxacor and fenclorim.	glutathione S-transferase TAU 19 (GSTU19); FUNCTIONS IN: glutathione transferase activity, glutathione binding; INVOLVED IN: response to oxidative stress, response to cadmium ion, response to cyclopentenone, toxin catabolic process, cellular response to water deprivation; LOCATED IN: chloroplast, plasma membrane, chloroplast stroma, cytoplasm; EXPRESSED IN: 26 plant structures; EXPRESSED DURING: …	0.870032	6.54016e-27	0.909787	4.67942e-33
Solyc03g082420.3.1	ME10	1	Small heat shock protein, chloroplastic (AHRD V3.3 *** HS21C_SOLLC)	AT4G27670.1	59.15	1e-79	243	heat shock protein 21	chloroplast located small heat shock protein.	heat shock protein 21 (HSP21); CONTAINS InterPro DOMAIN/s: Heat shock protein Hsp20 (InterPro:IPR002068), HSP20-like chaperone (InterPro:IPR008978); BEST Arabidopsis thaliana protein match is: HSP20-like chaperones superfamily protein (TAIR:AT5G51440.1); Has 6158 Blast hits to 6158 proteins in 1414 species: Archae - 225; Bacteria - 3528; Metazoa - 23; Fungi - 170; Plants - 1466; Viruses - 0; Othe…	0.831039	1.35422e-22	0.909683	4.89349e-33
Solyc06g011380.2.1	ME10	0	Chaperone protein ClpB (AHRD V3.3 *-* B2IUM0_NOSP7)	AT2G25140.1	93.06	3e-108	335	casein lytic proteinase B4	Encodes ClpB4, which belongs to the Casein lytic proteinase/heat shock protein 100 (Clp/Hsp100) family. Targeted to the mitochondrion, also referred to as ClpB-m. Transcripts of ClpB4 accumulate dramatically at high temperatures, suggesting that it may be involved in response to heat stress.	casein lytic proteinase B4 (CLPB4); FUNCTIONS IN: nucleoside-triphosphatase activity, ATPase activity, nucleotide binding, ATP binding; INVOLVED IN: response to heat; LOCATED IN: mitochondrion, chloroplast; EXPRESSED IN: 22 plant structures; EXPRESSED DURING: 13 growth stages; CONTAINS InterPro DOMAIN/s: Clp ATPase, C-terminal (InterPro:IPR019489), ATPase, AAA+ type, core (InterPro:IPR003593), AT…	0.870915	5.03706e-27	0.908163	9.40672e-33
Solyc05g014280.4.1	ME10	1	small heat shock protein 1	AT4G27670.1	47.88	1e-43	149	heat shock protein 21	chloroplast located small heat shock protein.	heat shock protein 21 (HSP21); CONTAINS InterPro DOMAIN/s: Heat shock protein Hsp20 (InterPro:IPR002068), HSP20-like chaperone (InterPro:IPR008978); BEST Arabidopsis thaliana protein match is: HSP20-like chaperones superfamily protein (TAIR:AT5G51440.1); Has 6158 Blast hits to 6158 proteins in 1414 species: Archae - 225; Bacteria - 3528; Metazoa - 23; Fungi - 170; Plants - 1466; Viruses - 0; Othe…	0.82216	9.15384e-22	0.907187	1.42212e-32
Solyc10g008040.4.1	ME10	1	Seed biotin-containing protein SBP65 (AHRD V3.3 *-* SBP65_PEA)	NA	NA	NA	NA	NA	NA	NA	0.754914	1.09283e-16	0.907112	1.46793e-32
Solyc01g091130.4.1	ME10	0	Nitroreductase family protein (AHRD V3.3 *** A0A2K3NXL4_TRIPR)	AT1G02020.1	66.5	0	793	nitroreductase family protein	0	nitroreductase family protein; FUNCTIONS IN: oxidoreductase activity, acting on NADH or NADPH, nitrogenous group as acceptor, oxidoreductase activity; INVOLVED IN: metabolic process; LOCATED IN: chloroplast; EXPRESSED IN: 23 plant structures; EXPRESSED DURING: 13 growth stages; CONTAINS InterPro DOMAIN/s: Nitroreductase-like (InterPro:IPR000415); Has 762 Blast hits to 681 proteins in 314 species:…	0.819173	1.70012e-21	0.906898	1.60611e-32
Solyc10g081800.2.1	ME10	1	MD-2-related lipid recognition domain-containing protein / ML domain-containing protein (AHRD V3.3 *** A0A2U1NF61_ARTAN)	AT3G11780.1	53.57	8e-51	163	MD-2-related lipid recognition domain-containing protein / ML domain-containing protein	0	MD-2-related lipid recognition domain-containing protein / ML domain-containing protein; FUNCTIONS IN: molecular_function unknown; INVOLVED IN: biological_process unknown; LOCATED IN: vacuole; EXPRESSED IN: 23 plant structures; EXPRESSED DURING: 13 growth stages; CONTAINS InterPro DOMAIN/s: Immunoglobulin E-set (InterPro:IPR014756), MD-2-related lipid-recognition (InterPro:IPR003172); BEST Arabid…	0.661849	7.1507e-12	0.90409	5.12861e-32
Solyc02g092860.3.1	ME10	1	Cytochrome P450 (AHRD V3.3 *** Q9XFX1_CICAR)	AT4G37370.1	56.68	0	575	cytochrome P450, family 81, subfamily D, polypeptide 8	member of CYP81D	cytochrome P450, family 81, subfamily D, polypeptide 8 (CYP81D8); FUNCTIONS IN: electron carrier activity, monooxygenase activity, iron ion binding, oxygen binding, heme binding; INVOLVED IN: response to karrikin; LOCATED IN: endoplasmic reticulum, plasma membrane; EXPRESSED IN: 20 plant structures; EXPRESSED DURING: 13 growth stages; CONTAINS InterPro DOMAIN/s: Cytochrome P450 (InterPro:IPR00112…	0.877222	7.36476e-28	0.903743	5.90509e-32
Solyc12g042830.3.1	ME10	0	Class I heat shock protein (AHRD V3.3 *-* A0A2U1P7Z6_ARTAN)	AT1G52560.2	65.82	5e-29	105	HSP20-like chaperones superfamily protein	0	HSP20-like chaperones superfamily protein; FUNCTIONS IN: molecular_function unknown; INVOLVED IN: response to high light intensity, response to hydrogen peroxide, response to heat; LOCATED IN: mitochondrion; EXPRESSED IN: 6 plant structures; EXPRESSED DURING: 4 anthesis, petal differentiation and expansion stage; CONTAINS InterPro DOMAIN/s: Heat shock protein Hsp20 (InterPro:IPR002068), HSP20-lik…	0.745558	4.12682e-16	0.903101	7.6544e-32	gonzalez
Solyc07g053750.1.1	ME10	1	Zinc finger transcription factor 50	AT1G03790.1	45.96	2e-88	278	Zinc finger C-x8-C-x5-C-x3-H type family protein	Encodes SOMNUS (SOM), a nucleus-localized CCCH-type zinc finger protein. SOM negatively regulates light-dependent seed germination downstream of PIL5 (AT2G20180).	SOMNUS (SOM); CONTAINS InterPro DOMAIN/s: Zinc finger, CCCH-type (InterPro:IPR000571); BEST Arabidopsis thaliana protein match is: Zinc finger C-x8-C-x5-C-x3-H type family protein (TAIR:AT5G44260.1); Has 3270 Blast hits to 1059 proteins in 150 species: Archae - 0; Bacteria - 0; Metazoa - 444; Fungi - 30; Plants - 421; Viruses - 3; Other Eukaryotes - 2372 (source: NCBI BLink).	0.683196	8.07897e-13	0.901823	1.27579e-31	both
Solyc06g011370.4.1	ME10	0	Chaperone protein ClpB (AHRD V3.3 *-* B2IUM0_NOSP7)	AT2G25140.1	67.98	2e-104	330	casein lytic proteinase B4	Encodes ClpB4, which belongs to the Casein lytic proteinase/heat shock protein 100 (Clp/Hsp100) family. Targeted to the mitochondrion, also referred to as ClpB-m. Transcripts of ClpB4 accumulate dramatically at high temperatures, suggesting that it may be involved in response to heat stress.	casein lytic proteinase B4 (CLPB4); FUNCTIONS IN: nucleoside-triphosphatase activity, ATPase activity, nucleotide binding, ATP binding; INVOLVED IN: response to heat; LOCATED IN: mitochondrion, chloroplast; EXPRESSED IN: 22 plant structures; EXPRESSED DURING: 13 growth stages; CONTAINS InterPro DOMAIN/s: Clp ATPase, C-terminal (InterPro:IPR019489), ATPase, AAA+ type, core (InterPro:IPR003593), AT…	0.856667	2.73717e-25	0.901462	1.4718e-31
Solyc05g016370.2.1	ME10	0	Unknown protein	NA	NA	NA	NA	NA	NA	NA	0.674763	1.95373e-12	0.900737	1.95875e-31
Solyc08g081455.1.1	ME10	0	Unknown protein	NA	NA	NA	NA	NA	NA	NA	0.919235	6.07886e-35	0.898083	5.47247e-31
Solyc03g019820.3.1	ME10	1	tonoplast intrinsic protein 3.2	AT1G17810.1	70.04	2e-121	351	beta-tonoplast intrinsic protein	beta-tonoplast intrinsic protein (beta-TIP) mRNA, complete	beta-tonoplast intrinsic protein (BETA-TIP); FUNCTIONS IN: water channel activity; INVOLVED IN: transport, transmembrane transport; LOCATED IN: integral to membrane, membrane; EXPRESSED DURING: seedling growth; CONTAINS InterPro DOMAIN/s: Major intrinsic protein, conserved site (InterPro:IPR022357), Aquaporin (InterPro:IPR012269), Major intrinsic protein (InterPro:IPR000425); BEST Arabidopsis tha…	0.659311	9.15905e-12	0.897618	6.53217e-31	gonzalez	1
Solyc02g085590.4.1	ME10	1	vicilin-like seed storage protein At2g18540 (AHRD V3.3 *-* A0A2I4F3W3_9ROSI)	AT2G18540.2	50.63	1e-121	383	NA	NA	NA	0.680238	1.10496e-12	0.897608	6.55799e-31
Solyc08g077490.2.1	ME10	0	Vacuolar protein sorting 13 (AHRD V3.3 *-* J7FHV5_MESCR)	AT4G17140.2	70.41	0	905	pleckstrin homology (PH) domain-containing protein	0	pleckstrin homology (PH) domain-containing protein; FUNCTIONS IN: molecular_function unknown; INVOLVED IN: biological_process unknown; EXPRESSED IN: 23 plant structures; EXPRESSED DURING: 13 growth stages; CONTAINS InterPro DOMAIN/s: Protein of unknown function DUF946 (InterPro:IPR009291), Pleckstrin homology (InterPro:IPR001849); BEST Arabidopsis thaliana protein match is: calcium-dependent lipi…	0.84112	1.3458e-23	0.897346	7.24321e-31
Solyc07g007710.4.1	ME10	1	Defensin protein (AHRD V3.3 *** B1N680_SOLLC),Pfam:PF00304	AT2G02100.1	62.82	2e-27	98.2	low-molecular-weight cysteine-rich 69	Predicted to encode a PR (pathogenesis-related) protein. Belongs to the plant defensin (PDF) family with the following members: At1g75830/PDF1.1, At5g44420/PDF1.2a, At2g26020/PDF1.2b, At5g44430/PDF1.2c, At2g26010/PDF1.3, At1g19610/PDF1.4, At1g55010/PDF1.5, At2g02120/PDF2.1, At2g02100/PDF2.2, At2g02130/PDF2.3, At1g61070/PDF2.4, At5g63660/PDF2.5, At2g02140/PDF2.6, At5g38330/PDF3.1 and At4g30070/PDF…	low-molecular-weight cysteine-rich 69 (LCR69); FUNCTIONS IN: peptidase inhibitor activity; INVOLVED IN: defense response; LOCATED IN: plasma membrane, plant-type cell wall; EXPRESSED IN: 23 plant structures; EXPRESSED DURING: 13 growth stages; CONTAINS InterPro DOMAIN/s: Gamma thionin (InterPro:IPR008176), Knottin (InterPro:IPR003614), Gamma Purothionin (InterPro:IPR008177); BEST Arabidopsis thal…	0.661368	7.49544e-12	0.895831	1.28028e-30
Solyc07g064280.3.1	ME10	0	Tryptophan synthase beta chain (AHRD V3.3 *** B2J8R2_NOSP7)	AT5G54810.1	83.37	0	771	tryptophan synthase beta-subunit 1	A.thaliana tryptophan synthase beta subunit (trpB)	tryptophan synthase beta-subunit 1 (TSB1); FUNCTIONS IN: tryptophan synthase activity; INVOLVED IN: response to oxidative stress, tryptophan biosynthetic process, response to salt stress, indoleacetic acid biosynthetic process; LOCATED IN: chloroplast stroma, chloroplast; EXPRESSED IN: guard cell, root; CONTAINS InterPro DOMAIN/s: Tryptophan synthase, beta chain (InterPro:IPR006654), Tryptophan s…	0.704815	7.29761e-14	0.895526	1.43424e-30
Solyc04g014480.3.1	ME10	1	15.7 kDa heat shock protein, peroxisomal (AHRD V3.3 *** A0A1U8GLK8_CAPAN)	AT5G37670.1	61.38	4e-53	168	HSP20-like chaperones superfamily protein	0	HSP20-like chaperones superfamily protein; CONTAINS InterPro DOMAIN/s: Heat shock protein Hsp20 (InterPro:IPR002068), HSP20-like chaperone (InterPro:IPR008978); BEST Arabidopsis thaliana protein match is: HSP20-like chaperones superfamily protein (TAIR:AT1G59860.1); Has 1807 Blast hits to 1807 proteins in 277 species: Archae - 0; Bacteria - 0; Metazoa - 736; Fungi - 347; Plants - 385; Viruses - 0…	0.855347	3.87753e-25	0.8934	3.13588e-30
Solyc07g062060.3.1	ME10	1	Peptide methionine sulfoxide reductase MsrB (AHRD V3.3 *** A0A2Z5A926_9PSED)	AT1G53670.1	65.98	9e-85	253	methionine sulfoxide reductase B 1	0	methionine sulfoxide reductase B 1 (MSRB1); FUNCTIONS IN: peptide-methionine-(S)-S-oxide reductase activity; INVOLVED IN: response to oxidative stress, N-terminal protein myristoylation; LOCATED IN: chloroplast stroma, chloroplast; EXPRESSED IN: 23 plant structures; EXPRESSED DURING: 13 growth stages; CONTAINS InterPro DOMAIN/s: Methionine sulphoxide reductase B (InterPro:IPR002579), Mss4-like (I…	0.854688	4.60782e-25	0.892267	4.72498e-30
Solyc12g042570.2.1	ME10	1	Protein phosphatase 2C family protein (AHRD V3.3 *** A0A2U1P9P3_ARTAN)	AT4G31860.1	67.05	2e-172	489	Protein phosphatase 2C family protein	0	Protein phosphatase 2C family protein; FUNCTIONS IN: protein serine/threonine phosphatase activity, catalytic activity; INVOLVED IN: protein amino acid dephosphorylation, N-terminal protein myristoylation; LOCATED IN: plasma membrane; EXPRESSED IN: 24 plant structures; EXPRESSED DURING: 15 growth stages; CONTAINS InterPro DOMAIN/s: Protein phosphatase 2C, manganese/magnesium aspartate binding sit…	0.895091	1.68568e-30	0.89192	5.35336e-30
Solyc08g079055.1.1	ME10	1	Unknown protein	NA	NA	NA	NA	NA	NA	NA	0.810775	9.1359e-21	0.89179	5.60894e-30
Solyc09g065470.3.1	ME10	1	Vicilin-like antimicrobial peptides 2-1 (AHRD V3.3 *** AMP21_MACIN)	AT3G22640.1	32.41	1e-70	233	cupin family protein	0	PAP85; FUNCTIONS IN: nutrient reservoir activity; INVOLVED IN: biological_process unknown; LOCATED IN: plant-type cell wall; EXPRESSED IN: stem, seed; EXPRESSED DURING: seedling growth, seed development stages; CONTAINS InterPro DOMAIN/s: Cupin, RmlC-type (InterPro:IPR011051), Cupin 1 (InterPro:IPR006045), RmlC-like jelly roll fold (InterPro:IPR014710); BEST Arabidopsis thaliana protein match is:…	0.678731	1.2942e-12	0.890589	8.60303e-30	terrasson	1
Solyc10g008850.2.1	ME10	0	transmembrane protein (AHRD V3.3 *-* AT1G28540.1)	AT1G28540.1	59.34	1e-30	108	0	0	unknown protein; Has 25 Blast hits to 25 proteins in 10 species: Archae - 0; Bacteria - 0; Metazoa - 0; Fungi - 0; Plants - 25; Viruses - 0; Other Eukaryotes - 0 (source: NCBI BLink).	0.774285	5.7199e-18	0.886048	4.15e-29	terrasson
Solyc12g096080.2.1	ME10	1	Glycosyltransferase (AHRD V3.3 *** A0A2U1QCQ5_ARTAN)	AT4G34131.1	25.88	4e-45	167	UDP-glucosyl transferase 73B3	0	UDP-glucosyl transferase 73B3 (UGT73B3); FUNCTIONS IN: transferase activity, transferring hexosyl groups, quercetin 3-O-glucosyltransferase activity, UDP-glycosyltransferase activity, UDP-glucosyltransferase activity; INVOLVED IN: response to cyclopentenone, response to other organism; LOCATED IN: endomembrane system; CONTAINS InterPro DOMAIN/s: UDP-glucuronosyl/UDP-glucosyltransferase (InterPro:…	0.635238	8.5638e-11	0.882195	1.49862e-28	gonzalez
Solyc07g052480.3.1	ME10	1	isocitrate lyase LEU18678	AT3G21720.1	81.42	0	1022	isocitrate lyase	Encodes a glyoxylate cycle enzyme isocitrate lyase (ICL).	isocitrate lyase (ICL); FUNCTIONS IN: isocitrate lyase activity, catalytic activity; INVOLVED IN: carboxylic acid metabolic process, metabolic process; LOCATED IN: cellular_component unknown; EXPRESSED IN: leaf whorl, seed, leaf; CONTAINS InterPro DOMAIN/s: Isocitrate lyase/phosphorylmutase, conserved site (InterPro:IPR018523), Pyruvate/Phosphoenolpyruvate kinase, catalytic core (InterPro:IPR0158…	0.840473	1.56807e-23	0.879646	3.41924e-28
Solyc08g079160.3.1	ME10	1	Vacuolar-processing enzyme (AHRD V3.3 *** A0A2G2XLA7_CAPBA)	AT1G62710.1	70.35	0	678	beta vacuolar processing enzyme	Encodes a vacuolar processing enzyme belonging to a novel group of cysteine proteases that is expressed specifically in seeds and is essential for the proper processing of storage proteins.	beta vacuolar processing enzyme (BETA-VPE); FUNCTIONS IN: cysteine-type endopeptidase activity; INVOLVED IN: proteolysis, response to salt stress, vacuolar protein processing; LOCATED IN: endomembrane system; EXPRESSED IN: 23 plant structures; EXPRESSED DURING: 13 growth stages; CONTAINS InterPro DOMAIN/s: Peptidase C13, legumain (InterPro:IPR001096); BEST Arabidopsis thaliana protein match is: g…	0.628446	1.55405e-10	0.879306	3.81114e-28	both
Solyc06g067980.3.1	ME10	1	repressed By RIM101 protein 1 (AHRD V3.3 --* XP_011091441.1)	NA	NA	NA	NA	NA	NA	NA	0.721498	9.79407e-15	0.879184	3.96198e-28
Solyc02g090370.4.1	ME10	1	Reticulon-like protein (AHRD V3.3 *** A0A2G3ABJ1_CAPAN)	AT2G23640.1	39.6	2e-29	110	Reticulan like protein B13	0	Reticulan like protein B13 (RTNLB13); CONTAINS InterPro DOMAIN/s: Reticulon (InterPro:IPR003388); BEST Arabidopsis thaliana protein match is: Reticulon family protein (TAIR:AT3G10915.3); Has 751 Blast hits to 751 proteins in 54 species: Archae - 0; Bacteria - 0; Metazoa - 324; Fungi - 0; Plants - 418; Viruses - 0; Other Eukaryotes - 9 (source: NCBI BLink).	0.641033	5.09022e-11	0.878107	5.57665e-28
Solyc08g062340.3.1	ME10	0	17.9 kDa class II heat shock protein (AHRD V3.3 *** A0A2G3A1B9_CAPAN)	AT5G12020.1	65.16	2e-56	177	17.6 kDa class II heat shock protein	0	17.6 kDa class II heat shock protein (HSP17.6II); CONTAINS InterPro DOMAIN/s: Heat shock protein Hsp20 (InterPro:IPR002068), HSP20-like chaperone (InterPro:IPR008978); BEST Arabidopsis thaliana protein match is: heat shock protein 17.6A (TAIR:AT5G12030.1); Has 1807 Blast hits to 1807 proteins in 277 species: Archae - 0; Bacteria - 0; Metazoa - 736; Fungi - 347; Plants - 385; Viruses - 0; Other Eu…	0.707909	5.082e-14	0.876243	9.99464e-28	gonzalez
Solyc02g070760.4.1	ME10	0	D(P)-binding Rossmann-fold superfamily protein (AHRD V3.3 *** A0A2U1NQA9_ARTAN)	AT2G34460.1	68.7	1e-127	369	NAD(P)-binding Rossmann-fold superfamily protein	0	NAD(P)-binding Rossmann-fold superfamily protein; FUNCTIONS IN: binding, catalytic activity; INVOLVED IN: metabolic process; LOCATED IN: chloroplast thylakoid membrane, chloroplast, plastoglobule, chloroplast envelope; EXPRESSED IN: 21 plant structures; EXPRESSED DURING: 13 growth stages; CONTAINS InterPro DOMAIN/s: NAD(P)-binding domain (InterPro:IPR016040), NmrA-like (InterPro:IPR008030); BEST …	0.691964	3.12521e-13	0.870247	6.13961e-27	gonzalez
Solyc02g021150.1.1	ME10	1	Unknown protein	NA	NA	NA	NA	NA	NA	NA	0.699428	1.35532e-13	0.863965	3.74174e-26
Solyc03g097440.3.1	ME10	0	11-beta-hydroxysteroid dehydrogenase 1A (AHRD V3.3 *** A0A2G3A0G7_CAPAN)	AT5G50700.1	59.94	8e-151	433	hydroxysteroid dehydrogenase 1	Encodes a hydroxysteroid dehydrogenase HSD1. Two copies of HSD1 (At5g50600 and At5g50700) exist in the Arabidopsis genome as a result of an exact 33-kb duplication on chromosome 5 encompassing seven genes. There are five homologs of HSD1 in Arabidopsis (HSD2-At3g47350, HSD3-At3g47360, HSD4-At5g50590, HSD4-At5g50690 and HSD6-At5g50770; HSD4 has two copies due to the same gene duplication event occ…	hydroxysteroid dehydrogenase 1 (HSD1); FUNCTIONS IN: oxidoreductase activity, binding, catalytic activity; INVOLVED IN: oxidation reduction, metabolic process; LOCATED IN: endomembrane system; EXPRESSED IN: seed; CONTAINS InterPro DOMAIN/s: Short-chain dehydrogenase/reductase, conserved site (InterPro:IPR020904), NAD(P)-binding domain (InterPro:IPR016040), Glucose/ribitol dehydrogenase (InterPro:…	0.595123	2.37095e-09	0.857452	2.22195e-25	terrasson
Solyc01g087460.3.1	ME10	1	Protein phosphatase 2C (AHRD V3.3 *** A0A2U1L3D8_ARTAN)	AT2G34740.1	63.39	5e-111	332	Protein phosphatase 2C family protein	0	Protein phosphatase 2C family protein; FUNCTIONS IN: protein serine/threonine phosphatase activity, catalytic activity; INVOLVED IN: biological_process unknown; LOCATED IN: cellular_component unknown; CONTAINS InterPro DOMAIN/s: Protein phosphatase 2C-related (InterPro:IPR001932), Protein phosphatase 2C, N-terminal (InterPro:IPR014045), Protein phosphatase 2C (InterPro:IPR015655); BEST Arabidopsi…	0.74871	2.6548e-16	0.857361	2.27651e-25	terrasson
Solyc01g073710.2.1	ME10	0	Calcium-binding EF-hand family protein (AHRD V3.3 *** O64866_ARATH)	AT2G44310.1	69.34	9e-63	192	Calcium-binding EF-hand family protein	0	Calcium-binding EF-hand family protein; FUNCTIONS IN: calcium ion binding; INVOLVED IN: biological_process unknown; LOCATED IN: cellular_component unknown; EXPRESSED IN: 23 plant structures; EXPRESSED DURING: 14 growth stages; CONTAINS InterPro DOMAIN/s: EF-Hand 1, calcium-binding site (InterPro:IPR018247), EF-HAND 2 (InterPro:IPR018249), EF-hand-like domain (InterPro:IPR011992), Calcium-binding …	0.702075	1.00152e-13	0.857133	2.41854e-25
Solyc02g084850.3.1	ME10	0	Abscisic acid and environmental stress-inducible protein TAS14 (AHRD V3.3 --* TAS14_SOLLC)	NA	NA	NA	NA	NA	NA	NA	0.809662	1.13433e-20	0.856035	3.23547e-25
Solyc03g006110.3.1	ME10	0	Non-specific serine/threonine protein kinase (AHRD V3.3 *** A0A2G2ZLG0_CAPAN)	AT5G45820.1	64.77	0	603	CBL-interacting protein kinase 20	Encodes a CBL-interacting serine/threonine protein kinase comprised of an N-terminal kinase catalytic domain similar to SNF1/AMPK and a unique C-terminal regulatory domain.	CBL-interacting protein kinase 20 (CIPK20); CONTAINS InterPro DOMAIN/s: Protein kinase, ATP binding site (InterPro:IPR017441), Serine/threonine-protein kinase domain (InterPro:IPR002290), NAF/FISL domain (InterPro:IPR018451), Serine/threonine-protein kinase-like domain (InterPro:IPR017442), Protein kinase-like domain (InterPro:IPR011009), Serine/threonine-protein kinase, active site (InterPro:IPR…	0.784377	1.09256e-18	0.853999	5.51408e-25
Solyc05g015070.4.1	ME10	1	RING-type E3 ubiquitin transferase (AHRD V3.3 *** A0A2G2VMV0_CAPBA)	AT1G24330.2	63.25	0	847	NA	NA	NA	0.893193	3.38038e-30	0.851207	1.1305e-24
Solyc04g005250.4.1	ME10	1	cytosine-5 D methyltransferase1	AT5G15380.1	54.15	0	574	domains rearranged methylase 1	Encodes methyltransferase involved in the de novo DNA methylation and maintenance of asymmetric methylation of DNA sequences.	domains rearranged methylase 1 (DRM1); CONTAINS InterPro DOMAIN/s: Ubiquitin-associated/translation elongation factor EF1B, N-terminal, eukaryote (InterPro:IPR015940), DNA methylase, C-5 cytosine-specific (InterPro:IPR001525); BEST Arabidopsis thaliana protein match is: domains rearranged methyltransferase 2 (TAIR:AT5G14620.1); Has 662 Blast hits to 554 proteins in 116 species: Archae - 0; Bacter…	0.607193	9.16353e-10	0.848356	2.31868e-24
Solyc06g066270.1.1	ME10	1	Cytochrome P450 (AHRD V3.3 *-* A0A200PMQ1_9MAGN)	AT2G45550.1	45.36	2e-159	467	cytochrome P450, family 76, subfamily C, polypeptide 4	member of CYP76C	cytochrome P450, family 76, subfamily C, polypeptide 4 (CYP76C4); FUNCTIONS IN: electron carrier activity, monooxygenase activity, iron ion binding, oxygen binding, heme binding; INVOLVED IN: oxidation reduction; EXPRESSED IN: stem, root, carpel; EXPRESSED DURING: 4 anthesis; CONTAINS InterPro DOMAIN/s: Cytochrome P450 (InterPro:IPR001128), Cytochrome P450, E-class, group I (InterPro:IPR002401), …	0.808107	1.53145e-20	0.846422	3.74221e-24
Solyc10g051010.3.1	ME10	0	Pentatricopeptide repeat-containing protein (AHRD V3.3 *** A0A1J3E260_NOCCA)	AT2G15980.1	47.78	2e-141	420	Tetratricopeptide repeat (TPR)-like superfamily protein	0	Tetratricopeptide repeat (TPR)-like superfamily protein; CONTAINS InterPro DOMAIN/s: Pentatricopeptide repeat (InterPro:IPR002885); BEST Arabidopsis thaliana protein match is: Tetratricopeptide repeat (TPR)-like superfamily protein (TAIR:AT5G39710.1); Has 28218 Blast hits to 10356 proteins in 245 species: Archae - 1; Bacteria - 15; Metazoa - 229; Fungi - 251; Plants - 27094; Viruses - 0; Other Eu…	0.785798	8.59273e-19	0.839642	1.90657e-23
Solyc07g063560.4.1	ME10	0	Cotton fiber (DUF761) (AHRD V3.3 *** F4HTI9_ARATH)	AT1G61260.1	39.04	7e-63	209	Protein of unknown function (DUF761)	0	Protein of unknown function (DUF761); FUNCTIONS IN: molecular_function unknown; INVOLVED IN: biological_process unknown; LOCATED IN: endomembrane system; EXPRESSED IN: 12 plant structures; EXPRESSED DURING: 7 growth stages; CONTAINS InterPro DOMAIN/s: Protein of unknown function DUF761, plant (InterPro:IPR008480); BEST Arabidopsis thaliana protein match is: Protein of unknown function (DUF761) (T…	0.738925	1.02277e-15	0.835658	4.79337e-23
Solyc02g090790.1.1	ME10	0	Ethylene-responsive transcription factor (AHRD V3.3 *** A0A2G3D8S0_CAPCH)	AT2G33710.2	66.23	5e-27	106	Integrase-type DNA-binding superfamily protein	encodes a member of the ERF (ethylene response factor) subfamily B-4 of ERF/AP2 transcription factor family. The protein contains one AP2 domain. There are 7 members in this subfamily.	Integrase-type DNA-binding superfamily protein; CONTAINS InterPro DOMAIN/s: DNA-binding, integrase-type (InterPro:IPR016177), Pathogenesis-related transcriptional factor/ERF, DNA-binding (InterPro:IPR001471); BEST Arabidopsis thaliana protein match is: Integrase-type DNA-binding superfamily protein (TAIR:AT5G61890.1).	0.773579	6.40147e-18	0.830374	1.56846e-22
Solyc03g116390.4.1	ME10	1	Late embryogenesis abundant protein Dc3 (AHRD V3.3 *** A0A1U8FUJ0_CAPAN)	AT3G15670.1	44.16	2e-31	117	Late embryogenesis abundant protein (LEA) family protein	0	Late embryogenesis abundant protein (LEA) family protein; FUNCTIONS IN: molecular_function unknown; INVOLVED IN: embryo development ending in seed dormancy; LOCATED IN: nucleus; EXPRESSED DURING: dry seed stage; BEST Arabidopsis thaliana protein match is: Late embryogenesis abundant protein (LEA) family protein (TAIR:AT1G52690.2); Has 12897 Blast hits to 6829 proteins in 1482 species: Archae - 30…	0.540944	1.08289e-07	0.827291	3.07434e-22
Solyc06g084130.3.1	ME10	0	Bax inhibitor 1-related (AHRD V3.3 *** A0A200Q4J7_9MAGN)	AT1G03070.3	76.64	1e-136	389	NA	NA	NA	0.700502	1.19921e-13	0.805928	2.32217e-20
Solyc02g083020.1.1	ME10	0	DUF241 domain-containing protein (AHRD V3.3 *** A0A1Q3CEB1_CEPFO)	AT4G35690.1	35.35	2e-44	155	Arabidopsis protein of unknown function (DUF241)	0	Arabidopsis protein of unknown function (DUF241); CONTAINS InterPro DOMAIN/s: Protein of unknown function DUF241, plant (InterPro:IPR004320); BEST Arabidopsis thaliana protein match is: Arabidopsis protein of unknown function (DUF241) (TAIR:AT4G35710.1); Has 1807 Blast hits to 1807 proteins in 277 species: Archae - 0; Bacteria - 0; Metazoa - 736; Fungi - 347; Plants - 385; Viruses - 0; Other Euka…	0.700249	1.23428e-13	0.803422	3.72291e-20	terrasson
Solyc07g006765.1.1	ME10	0	Unknown protein	NA	NA	NA	NA	NA	NA	NA	0.634923	8.80604e-11	0.803188	3.88915e-20
Solyc06g063300.4.1	ME10	0	F-box/kelch-repeat protein (AHRD V3.3 *-* A0A2G2WKX9_CAPBA)	AT1G51550.1	57.85	8e-96	298	Kelch repeat-containing F-box family protein	0	Kelch repeat-containing F-box family protein; FUNCTIONS IN: ubiquitin-protein ligase activity; INVOLVED IN: ubiquitin-dependent protein catabolic process; LOCATED IN: chloroplast; EXPRESSED IN: 22 plant structures; EXPRESSED DURING: 11 growth stages; CONTAINS InterPro DOMAIN/s: F-box domain, cyclin-like (InterPro:IPR001810), F-box domain, Skp2-like (InterPro:IPR022364), Galactose oxidase/kelch, b…	0.535475	1.53546e-07	0.798165	9.8077e-20
Solyc03g116660.3.1	ME10	0	transmembrane protein (AHRD V3.3 --* AT3G15780.1)	NA	NA	NA	NA	NA	NA	NA	0.547373	7.12543e-08	0.797804	1.04712e-19
Solyc01g112230.4.1	ME10	1	Plant EC metallothionein-like protein (AHRD V3.3 *** A0A200PQZ1_9MAGN)	NA	NA	NA	NA	NA	NA	NA	0.49342	1.85219e-06	0.792203	2.84401e-19
Solyc06g034040.1.1	ME10	1	Oleosin (AHRD V3.3 *** A0A2G3C5Y7_CAPCH)	AT4G25140.1	62.31	2e-47	154	oleosin 1	Encodes oleosin1, a protein found in oil bodies, involved in seed lipid accumulation. Suppression of OLEO1 (and OLEO2) resulted in an aberrant phenotype of embryo cells that contain unusually large oilbodies that are not normally observed in seeds. Changes in the size of oilbodies caused disruption of storage organelles, altering accumulation of lipids and proteins and causing delay in germinatio…	oleosin 1 (OLEO1); FUNCTIONS IN: molecular_function unknown; INVOLVED IN: response to freezing, lipid storage, seed germination, seed oilbody biogenesis; LOCATED IN: monolayer-surrounded lipid storage body, integral to membrane, membrane; EXPRESSED IN: shoot apex; CONTAINS InterPro DOMAIN/s: Oleosin (InterPro:IPR000136); BEST Arabidopsis thaliana protein match is: oleosin3 (TAIR:AT5G51210.1); Has…	0.502544	1.10974e-06	0.785591	8.90055e-19
Solyc06g064650.4.1	ME10	1	11-beta-hydroxysteroid dehydrogenase-like 5 (AHRD V3.3 *** A0A2G3AJQ9_CAPAN)	AT4G10020.1	67.01	0	536	hydroxysteroid dehydrogenase 5	Encodes a putative hydroxysteroid dehydrogenase (HSD). Genes that encode HSD include: At5g50600 and At5g50700 (HSD1), At3g47350(HSD2), At3g47360(HSD3), At5g50590 and At5g50690(HSD4), At5g50770(HSD6) (Plant Cell Physiology 50:1463). Two copies of HSD1 and HSD4 exist due to a gene duplication event. In Plant Physiology 145:87, At5g50690 is HSD7, At4g10020 is HSD5.	hydroxysteroid dehydrogenase 5 (HSD5); FUNCTIONS IN: oxidoreductase activity, binding, catalytic activity; INVOLVED IN: oxidation reduction, metabolic process; LOCATED IN: endomembrane system; CONTAINS InterPro DOMAIN/s: Short-chain dehydrogenase/reductase, conserved site (InterPro:IPR020904), NAD(P)-binding domain (InterPro:IPR016040), Glucose/ribitol dehydrogenase (InterPro:IPR002347), Short-ch…	0.474192	5.20079e-06	0.776188	4.21384e-18	both	1
Solyc02g079170.3.1	ME10	0	External alternative D(P)H-ubiquinone oxidoreductase B1, mitochondrial (AHRD V3.3 *** A0A2G3A937_CAPAN)	AT4G05020.1	76.75	0	919	NAD(P)H dehydrogenase B2	0	NAD(P)H dehydrogenase B2 (NDB2); FUNCTIONS IN: disulfide oxidoreductase activity, oxidoreductase activity, FAD binding; INVOLVED IN: oxidation reduction; LOCATED IN: mitochondrion, extrinsic to mitochondrial inner membrane; EXPRESSED IN: 26 plant structures; EXPRESSED DURING: 15 growth stages; CONTAINS InterPro DOMAIN/s: FAD-dependent pyridine nucleotide-disulphide oxidoreductase (InterPro:IPR013…	0.785356	9.26139e-19	0.77381	6.16938e-18
Solyc03g005880.3.1	ME10	0	Bidirectional sugar transporter SWEET (AHRD V3.3 *** A0A142DVG2_SOLTU)	AT3G14770.1	62.56	2e-91	273	Nodulin MtN3 family protein	0	Nodulin MtN3 family protein; FUNCTIONS IN: molecular_function unknown; INVOLVED IN: biological_process unknown; LOCATED IN: endomembrane system, integral to membrane, membrane; EXPRESSED IN: 22 plant structures; EXPRESSED DURING: 13 growth stages; CONTAINS InterPro DOMAIN/s: MtN3/saliva-related transmembrane protein, conserved region (InterPro:IPR018169), RAG1-activating protein 1 homologue (Inte…	0.615163	4.78445e-10	0.769296	1.2567e-17
Solyc01g105370.4.1	ME10	1	2-nitropropane dioxygenase-like protein (AHRD V3.3 *** Q9FMG0_ARATH)	AT5G64250.2	76.88	0	537	Aldolase-type TIM barrel family protein	0	Aldolase-type TIM barrel family protein; FUNCTIONS IN: oxidoreductase activity, catalytic activity, nitronate monooxygenase activity; INVOLVED IN: response to cadmium ion, response to symbiotic fungus, metabolic process; EXPRESSED IN: 23 plant structures; EXPRESSED DURING: 13 growth stages; CONTAINS InterPro DOMAIN/s: Aldolase-type TIM barrel (InterPro:IPR013785), 2-nitropropane dioxygenase, NPD …	0.660133	8.45548e-12	0.764977	2.44501e-17	gonzalez
Solyc05g053690.2.1	ME10	0	Ubiquitinyl hydrolase 1 (AHRD V3.3 *** A0A2G2ZTM8_CAPAN)	AT1G04860.1	40.8	0	623	ubiquitin-specific protease 2	Encodes a ubiquitin-specific protease.	ubiquitin-specific protease 2 (UBP2); FUNCTIONS IN: ubiquitin-specific protease activity; INVOLVED IN: ubiquitin-dependent protein catabolic process; LOCATED IN: proteasome complex, chloroplast; EXPRESSED IN: 24 plant structures; EXPRESSED DURING: 13 growth stages; CONTAINS InterPro DOMAIN/s: Zinc finger, UBP-type (InterPro:IPR001607), Peptidase C19, ubiquitin carboxyl-terminal hydrolase 2, conse…	0.673071	2.32419e-12	0.753162	1.40781e-16
Solyc01g103920.3.1	ME10	0	Ferredoxin (AHRD V3.3 *** K4B1W7_SOLLC)	AT1G60950.1	61.54	4e-59	183	2Fe-2S ferredoxin-like superfamily protein	encodes a major leaf ferredoxin	FED A; FUNCTIONS IN: electron carrier activity, iron-sulfur cluster binding, 2 iron, 2 sulfur cluster binding; INVOLVED IN: photosynthetic electron transport chain, response to light stimulus; LOCATED IN: chloroplast stroma, chloroplast; EXPRESSED IN: 22 plant structures; EXPRESSED DURING: 13 growth stages; CONTAINS InterPro DOMAIN/s: 2Fe-2S ferredoxin, iron-sulphur binding site (InterPro:IPR0060…	0.55356	4.72354e-08	0.750351	2.10457e-16	gonzalez
Solyc06g074170.3.1	ME10	0	C domain-containing protein 40 (AHRD V3.3 *** A0A2G2ZDN9_CAPAN)	AT2G27300.1	43.09	5e-82	259	NTM1-like 8	0	NTM1-like 8 (NTL8); CONTAINS InterPro DOMAIN/s: No apical meristem (NAM) protein (InterPro:IPR003441); BEST Arabidopsis thaliana protein match is: NAC domain containing protein 60 (TAIR:AT3G44290.1); Has 2835 Blast hits to 2829 proteins in 72 species: Archae - 0; Bacteria - 0; Metazoa - 0; Fungi - 0; Plants - 2835; Viruses - 0; Other Eukaryotes - 0 (source: NCBI BLink).	0.759233	5.79876e-17	0.74193	6.80369e-16
Solyc07g008440.3.1	ME10	0	Purine permease (AHRD V3.3 *** A0A2R6QYE6_ACTCH),Pfam:PF16913	AT1G28220.1	56.18	1e-141	410	purine permease 3	Member of a family of proteins related to PUP1, a purine transporter. May be involved in the transport of purine and purine derivatives such as cytokinins, across the plasma membrane.	purine permease 3 (PUP3); CONTAINS InterPro DOMAIN/s: Protein of unknown function DUF6, transmembrane (InterPro:IPR000620), Protein of unknown function DUF250 (InterPro:IPR004853); BEST Arabidopsis thaliana protein match is: purine permease 2 (TAIR:AT2G33750.2); Has 782 Blast hits to 771 proteins in 171 species: Archae - 1; Bacteria - 157; Metazoa - 97; Fungi - 2; Plants - 399; Viruses - 0; Other…	0.70888	4.53171e-14	0.736845	1.35202e-15	terrasson
Solyc02g081220.3.1	ME10	0	Reticuline oxidase-like protein (AHRD V3.3 *-* A0A1U8FLR4_CAPAN)	NA	NA	NA	NA	NA	NA	NA	0.576377	9.62443e-09	0.734456	1.85657e-15
Solyc05g007970.4.1	ME10	0	Phytanoyl-CoA dioxygenase (AHRD V3.3 *** A0A2G2VK26_CAPBA)	AT2G01490.2	72.04	4e-151	429	NA	NA	NA	0.788512	5.4039e-19	0.726028	5.53565e-15
Solyc02g093600.3.1	ME10	0	Class I heat shock protein (AHRD V3.3 *** A0A2K3K1J3_TRIPR)	AT1G53540.1	51.67	6e-34	119	HSP20-like chaperones superfamily protein	0	HSP20-like chaperones superfamily protein; CONTAINS InterPro DOMAIN/s: Heat shock protein Hsp20 (InterPro:IPR002068), HSP20-like chaperone (InterPro:IPR008978); BEST Arabidopsis thaliana protein match is: heat shock protein 17.4 (TAIR:AT3G46230.1); Has 7090 Blast hits to 7089 proteins in 1610 species: Archae - 175; Bacteria - 4287; Metazoa - 66; Fungi - 302; Plants - 1606; Viruses - 0; Other Euka…	0.552838	4.95782e-08	0.723672	7.4587e-15	terrasson
Solyc06g075530.1.1	ME10	0	Unknown protein	NA	NA	NA	NA	NA	NA	NA	0.588504	3.92821e-09	0.721705	9.54364e-15
Solyc04g049773.1.1	ME10	0	Unknown protein	NA	NA	NA	NA	NA	NA	NA	0.548217	6.7402e-08	0.720206	1.15017e-14
Solyc07g044970.1.1	ME10	0	P-loop containing nucleoside triphosphate hydrolase (AHRD V3.3 *** A0A2U1P4X5_ARTAN),Pfam:PF13671	NA	NA	NA	NA	NA	NA	NA	0.612926	5.75206e-10	0.713658	2.56177e-14
Solyc04g064620.4.1	ME10	0	Bidirectional sugar transporter SWEET (AHRD V3.3 *** M1CBD4_SOLTU)	AT1G21460.1	70.12	5e-116	337	Nodulin MtN3 family protein	0	Nodulin MtN3 family protein; INVOLVED IN: biological_process unknown; LOCATED IN: endomembrane system, integral to membrane, membrane; EXPRESSED IN: 24 plant structures; EXPRESSED DURING: 14 growth stages; CONTAINS InterPro DOMAIN/s: MtN3/saliva-related transmembrane protein, conserved region (InterPro:IPR018169), RAG1-activating protein 1 homologue (InterPro:IPR018179), RAG1-activating protein-1…	0.489152	2.34197e-06	0.706422	6.05034e-14	gonzalez
Solyc11g006910.3.1	ME10	0	Ferredoxin (AHRD V3.3 *** K4D4V2_SOLLC)	AT2G27510.1	62.61	4e-51	162	ferredoxin 3	0	ferredoxin 3 (FD3); FUNCTIONS IN: electron carrier activity, iron-sulfur cluster binding, 2 iron, 2 sulfur cluster binding; INVOLVED IN: electron transport chain; LOCATED IN: chloroplast; EXPRESSED IN: 22 plant structures; EXPRESSED DURING: 13 growth stages; CONTAINS InterPro DOMAIN/s: 2Fe-2S ferredoxin, iron-sulphur binding site (InterPro:IPR006058), Ferredoxin (InterPro:IPR001041), Ferredoxin […	0.602184	1.36615e-09	0.69088	3.52074e-13
Solyc02g084200.3.1	ME10	0	Zinc finger transcription factor 19	NA	NA	NA	NA	NA	NA	NA	0.548709	6.52487e-08	0.687735	4.96201e-13
Solyc07g006370.1.1	ME10	0	cation/calcium exchanger 1 (AHRD V3.3 *** A0A2I4FP28_9ROSI)	AT5G17860.1	47.61	2e-164	485	calcium exchanger 7	0	calcium exchanger 7 (CAX7); FUNCTIONS IN: cation:cation antiporter activity, calcium:sodium antiporter activity; INVOLVED IN: cation transport, transmembrane transport; LOCATED IN: endomembrane system, integral to membrane; EXPRESSED IN: 19 plant structures; EXPRESSED DURING: 10 growth stages; CONTAINS InterPro DOMAIN/s: Sodium/calcium exchanger membrane region (InterPro:IPR004837); BEST Arabidop…	0.632064	1.13338e-10	0.683817	7.56182e-13
Solyc05g050740.3.1	ME10	0	dentin sialophosphoprotein isoform X2 (AHRD V3.3 *-* XP_023890879.1)	NA	NA	NA	NA	NA	NA	NA	0.736074	1.49822e-15	0.658311	1.00909e-11
Solyc06g084325.1.1	ME10	0	Unknown protein	NA	NA	NA	NA	NA	NA	NA	0.485175	2.90593e-06	0.64694	2.96144e-11
Solyc10g085850.1.1	ME10	0	TPSI1 protein (AHRD V3.3 *** Q41336_SOLLC)	NA	NA	NA	NA	NA	NA	NA	-0.622737	2.5361e-10	-0.62849	1.54812e-10
Solyc09g082230.1.1	ME10	0	N-acetyltransferase (AHRD V3.3 *** A0A2N9Z4V7_PAEPO)	AT2G32030.1	53.76	9e-67	206	Acyl-CoA N-acyltransferases (NAT) superfamily protein	0	Acyl-CoA N-acyltransferases (NAT) superfamily protein; FUNCTIONS IN: N-acetyltransferase activity; INVOLVED IN: metabolic process; LOCATED IN: cellular_component unknown; EXPRESSED IN: 12 plant structures; EXPRESSED DURING: 8 growth stages; CONTAINS InterPro DOMAIN/s: GCN5-related N-acetyltransferase, C-terminal (InterPro:IPR022610), GCN5-related N-acetyltransferase (InterPro:IPR000182), Acyl-CoA…	-0.479678	3.89848e-06	-0.694649	2.32057e-13	terrasson
Solyc02g088740.1.1	ME10	0	hypothetical protein (AHRD V3.3 *** AT3G29370.1)	NA	NA	NA	NA	NA	NA	NA	-0.695558	2.09658e-13	-0.697025	1.77856e-13
Solyc02g077110.3.1	ME10	0	Phospholipase A1-II 1 (AHRD V3.3 *** A0A2G2XE87_CAPBA)	AT4G18550.2	58.88	2e-166	480	NA	NA	NA	-0.616617	4.24103e-10	-0.708408	4.79179e-14
Solyc08g068610.3.1	ME10	0	Serine decarboxylase (AHRD V3.3 *** A0A2G2W5V8_CAPBA)	AT1G43710.1	60.58	0	547	Pyridoxal phosphate (PLP)-dependent transferases superfamily protein	0	embryo defective 1075 (emb1075); FUNCTIONS IN: pyridoxal phosphate binding, carboxy-lyase activity, catalytic activity; INVOLVED IN: cellular amino acid metabolic process, embryo development ending in seed dormancy; LOCATED IN: cellular_component unknown; EXPRESSED IN: 25 plant structures; EXPRESSED DURING: 15 growth stages; CONTAINS InterPro DOMAIN/s: Pyridoxal phosphate-dependent transferase, m…	-0.599209	1.72626e-09	-0.709346	4.28881e-14
Solyc01g010180.3.1	ME10	0	Unknown protein	NA	NA	NA	NA	NA	NA	NA	-0.452347	1.5618e-05	-0.716449	1.82605e-14
Solyc08g080180.1.1	ME10	0	Molybdenum cofactor sulfurase-like protein (AHRD V3.3 *** A0A2K3L0M9_TRIPR)	AT5G51920.1	44.98	5e-166	490	Pyridoxal phosphate (PLP)-dependent transferases superfamily protein	0	Pyridoxal phosphate (PLP)-dependent transferases superfamily protein; FUNCTIONS IN: pyridoxal phosphate binding, catalytic activity; INVOLVED IN: metabolic process; LOCATED IN: chloroplast; CONTAINS InterPro DOMAIN/s: Pyridoxal phosphate-dependent transferase, major domain (InterPro:IPR015424), Aminotransferase, class V/Cysteine desulfurase (InterPro:IPR000192), Pyridoxal phosphate-dependent tran…	-0.646035	3.22015e-11	-0.727617	4.51919e-15
Solyc06g071810.1.1	ME10	0	Receptor-like protein kinase (AHRD V3.3 *** Q8LP72_TOBAC)	AT2G31880.1	59.94	0	751	Leucine-rich repeat protein kinase family protein	Encodes a putative leucine rich repeat transmembrane protein that is expressed in response to Pseudomonas syringae. Expression of SRRLK may be required for silencing via lsiRNAs. Regulates cell death and innate immunity.	SUPPRESSOR OF BIR1 1 (SOBIR1); FUNCTIONS IN: protein serine/threonine kinase activity, kinase activity, ATP binding; INVOLVED IN: protein amino acid phosphorylation, transmembrane receptor protein tyrosine kinase signaling pathway, positive regulation of defense response, negative regulation of floral organ abscission, positive regulation of cell death; LOCATED IN: plasma membrane; EXPRESSED IN: …	-0.650325	2.15967e-11	-0.73844	1.0918e-15
Solyc10g054080.3.1	ME10	0	Kinesin-related protein 11 (AHRD V3.3 *** A0A2G3BDZ7_CAPCH)	AT4G39050.1	71.63	0	1452	Kinesin motor family protein	0	Kinesin motor family protein; FUNCTIONS IN: microtubule motor activity, zinc ion binding, ATP binding; INVOLVED IN: microtubule-based movement; LOCATED IN: chloroplast; CONTAINS InterPro DOMAIN/s: Kinesin, motor region, conserved site (InterPro:IPR019821), Zinc finger, RING-type (InterPro:IPR001841), Kinesin, motor domain (InterPro:IPR001752); BEST Arabidopsis thaliana protein match is: Kinesin m…	-0.873496	2.32188e-27	-0.756361	8.85096e-17
Solyc06g060110.3.1	ME10	0	amino acid transporter 2	AT5G09220.1	73.63	0	733	amino acid permease 2	member of AAAP family	amino acid permease 2 (AAP2); CONTAINS InterPro DOMAIN/s: Amino acid transporter, transmembrane (InterPro:IPR013057); BEST Arabidopsis thaliana protein match is: amino acid permease 4 (TAIR:AT5G63850.1); Has 2701 Blast hits to 2684 proteins in 226 species: Archae - 0; Bacteria - 6; Metazoa - 573; Fungi - 420; Plants - 1375; Viruses - 0; Other Eukaryotes - 327 (source: NCBI BLink).	-0.633278	1.01851e-10	-0.759912	5.2424e-17
Solyc02g092820.4.1	ME10	0	IAA-amido synthetase 3-4	AT2G14960.1	75.83	0	957	Auxin-responsive GH3 family protein	encodes a protein similar to IAA-amido synthases. Lines carrying an insertion in this gene are hypersensitive to auxin.	GH3.1; CONTAINS InterPro DOMAIN/s: GH3 auxin-responsive promoter (InterPro:IPR004993); BEST Arabidopsis thaliana protein match is: Auxin-responsive GH3 family protein (TAIR:AT4G37390.1); Has 1628 Blast hits to 1412 proteins in 230 species: Archae - 1; Bacteria - 595; Metazoa - 55; Fungi - 2; Plants - 676; Viruses - 0; Other Eukaryotes - 299 (source: NCBI BLink).	-0.727806	4.41072e-15	-0.760857	4.55349e-17
Solyc11g031950.1.1	ME10	0	Glucuronoxylan 4-O-methyltransferase 2 (AHRD V3.3 *** A0A2G2VV10_CAPBA)	AT4G09990.1	59.53	4e-126	365	Protein of unknown function (DUF579)	0	Protein of unknown function (DUF579); FUNCTIONS IN: molecular_function unknown; INVOLVED IN: biological_process unknown; LOCATED IN: endomembrane system; EXPRESSED IN: 9 plant structures; EXPRESSED DURING: 4 anthesis, LP.10 ten leaves visible, petal differentiation and expansion stage; CONTAINS InterPro DOMAIN/s: Protein of unknown function DUF579 (InterPro:IPR021148), Conserved hypothetical prot…	-0.774682	5.36768e-18	-0.770782	9.96022e-18
Solyc02g092580.3.1	ME10	0	Peroxidase (AHRD V3.3 *** K4BD54_SOLLC)	AT5G67400.1	66.57	5e-162	460	root hair specific 19	0	root hair specific 19 (RHS19); FUNCTIONS IN: peroxidase activity, heme binding; INVOLVED IN: oxidation reduction, response to oxidative stress; LOCATED IN: endomembrane system; EXPRESSED IN: root hair, root; CONTAINS InterPro DOMAIN/s: Haem peroxidase (InterPro:IPR010255), Plant peroxidase (InterPro:IPR000823), Peroxidases heam-ligand binding site (InterPro:IPR019793), Haem peroxidase, plant/fung…	-0.736699	1.37847e-15	-0.778684	2.80953e-18
Solyc09g083400.3.1	ME10	0	Protein WVD2-like 1 (AHRD V3.3 *** A0A1U8G599_CAPAN)	AT3G23090.4	47.78	3e-76	245	NA	NA	NA	-0.784364	1.09506e-18	-0.813281	5.58051e-21	gonzalez
Solyc08g007805.1.1	ME10	0	DH dehydrogenase [ubiquinone] 1 alpha subcomplex subunit 8-B (AHRD V3.3 *** A0A1U8G8P8_CAPAN)	AT5G18800.2	45.28	6e-21	82	Cox19-like CHCH family protein	0	Cox19-like CHCH family protein; FUNCTIONS IN: NADH dehydrogenase (ubiquinone) activity; INVOLVED IN: mitochondrial electron transport, NADH to ubiquinone; LOCATED IN: mitochondrial respiratory chain complex I; EXPRESSED IN: 24 plant structures; EXPRESSED DURING: 14 growth stages; CONTAINS InterPro DOMAIN/s: CHCH (InterPro:IPR010625); BEST Arabidopsis thaliana protein match is: Cox19-like CHCH fam…	-0.746166	3.792e-16	-0.814311	4.54706e-21
Solyc03g095450.3.1	ME10	0	RING/U-box superfamily protein (AHRD V3.3 *** Q8L610_ARATH)	AT5G01960.1	69.42	0	587	RING/U-box superfamily protein	0	RING/U-box superfamily protein; FUNCTIONS IN: zinc ion binding; LOCATED IN: chloroplast; EXPRESSED IN: 23 plant structures; EXPRESSED DURING: 14 growth stages; CONTAINS InterPro DOMAIN/s: Zinc finger, RING-type, conserved site (InterPro:IPR017907), Zinc finger, RING-type (InterPro:IPR001841), Zinc finger, C3HC4 RING-type (InterPro:IPR018957); BEST Arabidopsis thaliana protein match is: RING/U-box…	-0.697213	1.74122e-13	-0.815018	3.94773e-21
Solyc02g093990.4.1	ME10	0	Adenylate kinase (AHRD V3.3 *** A0A200R4A0_9MAGN),Pfam:PF00406	AT3G01820.1	48.67	5e-67	212	P-loop containing nucleoside triphosphate hydrolases superfamily protein	0	P-loop containing nucleoside triphosphate hydrolases superfamily protein; FUNCTIONS IN: nucleobase, nucleoside, nucleotide kinase activity, nucleotide kinase activity, ATP binding; INVOLVED IN: nucleobase, nucleoside, nucleotide and nucleic acid metabolic process, anaerobic respiration, nucleotide metabolic process; LOCATED IN: mitochondrion; EXPRESSED IN: 22 plant structures; EXPRESSED DURING: 1…	-0.947501	2.29863e-42	-0.815197	3.80885e-21
Solyc01g098960.3.1	ME10	0	Hexosyltransferase (AHRD V3.3 *** A0A2G3BUG9_CAPCH)	AT1G54940.1	49.02	0	551	plant glycogenin-like starch initiation protein 4	0	plant glycogenin-like starch initiation protein 4 (PGSIP4); FUNCTIONS IN: transferase activity, transferring glycosyl groups; INVOLVED IN: biosynthetic process; LOCATED IN: endomembrane system; EXPRESSED IN: 6 plant structures; EXPRESSED DURING: petal differentiation and expansion stage; CONTAINS InterPro DOMAIN/s: Glycosyl transferase, family 8 (InterPro:IPR002495); BEST Arabidopsis thaliana pro…	-0.787439	6.49608e-19	-0.822991	7.68953e-22
Solyc12g009480.2.1	ME10	0	SPX domain-containing protein (AHRD V3.3 *** A0A1Q3BK26_CEPFO)	AT2G26660.1	66.78	8e-121	352	SPX domain gene 2	0	SPX domain gene 2 (SPX2); CONTAINS InterPro DOMAIN/s: SPX, N-terminal (InterPro:IPR004331); BEST Arabidopsis thaliana protein match is: SPX domain gene 1 (TAIR:AT5G20150.1); Has 1206 Blast hits to 1202 proteins in 209 species: Archae - 0; Bacteria - 6; Metazoa - 245; Fungi - 512; Plants - 320; Viruses - 0; Other Eukaryotes - 123 (source: NCBI BLink).	-0.735891	1.53522e-15	-0.828846	2.19319e-22
Solyc07g049530.3.1	ME10	1	1-aminocyclopropane-1-carboxylate oxidase 1	AT1G05010.1	74.92	3e-179	503	ethylene-forming enzyme	Encodes 1-aminocyclopropane-1-carboxylate oxidase	ethylene-forming enzyme (EFE); FUNCTIONS IN: 1-aminocyclopropane-1-carboxylate oxidase activity; INVOLVED IN: response to fungus, ethylene biosynthetic process; EXPRESSED IN: 22 plant structures; EXPRESSED DURING: 13 growth stages; CONTAINS InterPro DOMAIN/s: Oxoglutarate/iron-dependent oxygenase (InterPro:IPR005123); BEST Arabidopsis thaliana protein match is: 2-oxoglutarate (2OG) and Fe(II)-dep…	-0.687769	4.94372e-13	-0.829536	1.88582e-22
Solyc05g007930.3.1	ME10	0	Beta-1,3-galactosyltransferase 15 (AHRD V3.3 *** A0A1U8EV49_CAPAN)	AT1G26810.2	62.34	0	841	NA	NA	NA	-0.819623	1.5499e-21	-0.831653	1.18177e-22
Solyc09g090130.3.1	ME10	0	R2R3MYB transcription factor 15	AT3G23250.1	49.65	7e-86	262	myb domain protein 15	Member of the R2R3 factor gene family.	myb domain protein 15 (MYB15); CONTAINS InterPro DOMAIN/s: SANT, DNA-binding (InterPro:IPR001005), Homeodomain-like (InterPro:IPR009057), Myb, DNA-binding (InterPro:IPR014778), HTH transcriptional regulator, Myb-type, DNA-binding (InterPro:IPR017930), Homeodomain-related (InterPro:IPR012287), Myb transcription factor (InterPro:IPR015495); BEST Arabidopsis thaliana protein match is: myb domain pro…	-0.770374	1.06182e-17	-0.846025	4.12578e-24
Solyc11g069820.3.1	ME10	0	ABC transporter-like (AHRD V3.3 *** A0A200R5R6_9MAGN)	AT5G60740.1	67.03	0	1482	ABC transporter family protein	0	ABC transporter family protein; FUNCTIONS IN: ATPase activity, coupled to transmembrane movement of substances; LOCATED IN: endomembrane system; EXPRESSED IN: 10 plant structures; EXPRESSED DURING: L mature pollen stage, M germinated pollen stage, 4 anthesis, C globular stage, petal differentiation and expansion stage; CONTAINS InterPro DOMAIN/s: ATPase, AAA+ type, core (InterPro:IPR003593), ABC …	-0.914823	4.91955e-34	-0.852605	7.90512e-25
Solyc11g017460.3.1	ME10	0	U-box domain-containing protein 13 (AHRD V3.3 *** A0A1J3H637_NOCCA)	AT1G77460.4	67.11	0	2839	NA	NA	NA	-0.810226	1.01675e-20	-0.854825	4.44593e-25
Solyc11g010250.1.1	ME10	0	Avr9/Cf-9 rapidly elicited protein 75 (AHRD V3.3 *** Q9FQY9_TOBAC)	NA	NA	NA	NA	NA	NA	NA	-0.810771	9.14138e-21	-0.861908	6.63317e-26
Solyc01g097520.4.1	ME10	0	annexin 5	AT2G38750.1	50.8	3e-101	305	annexin 4	Annexins are a family of calcium dependent membrane binding proteins though to be involved in Golgi mediated secretion. This is one of four annexins identified in Arabidopsis.	annexin 4 (ANNAT4); FUNCTIONS IN: calcium-dependent phospholipid binding, calcium ion binding; INVOLVED IN: in 6 processes; LOCATED IN: cell surface; EXPRESSED IN: 21 plant structures; EXPRESSED DURING: 14 growth stages; CONTAINS InterPro DOMAIN/s: Annexin like protein (InterPro:IPR015472), Annexin repeat (InterPro:IPR018502), Annexin (InterPro:IPR001464); BEST Arabidopsis thaliana protein match …	-0.856524	2.84272e-25	-0.866629	1.75842e-26
Solyc12g094520.2.1	ME10	0	4-coumarate--CoA ligase-like 4 (AHRD V3.3 *** A0A2G3B4I9_CAPCH)	AT1G20510.1	75.14	0	850	OPC-8:0 CoA ligase1	0	OPC-8:0 CoA ligase1 (OPCL1); FUNCTIONS IN: 4-coumarate-CoA ligase activity; INVOLVED IN: phenylpropanoid metabolic process, jasmonic acid biosynthetic process, response to wounding; LOCATED IN: peroxisome; EXPRESSED IN: 22 plant structures; EXPRESSED DURING: 13 growth stages; CONTAINS InterPro DOMAIN/s: AMP-binding, conserved site (InterPro:IPR020845), AMP-dependent synthetase/ligase (InterPro:IP…	-0.816261	3.07523e-21	-0.869131	8.52182e-27	gonzalez
Solyc08g083370.4.1	ME10	0	Soluble inorganic pyrophosphatase (AHRD V3.3 *** A0A2G2VH82_CAPBA)	AT1G01050.2	87.06	8e-132	374	NA	NA	NA	-0.806703	2.00377e-20	-0.869914	6.77272e-27
Solyc01g099620.3.1	ME10	1	Respiratory burst oxidase-like protein (AHRD V3.3 *** C1IHQ9_9ROSI)	AT1G09090.2	69.85	0	1215	respiratory burst oxidase homolog B	NADPH-oxidase AtrbohB plays a role in seed after-ripening. Major producer of superoxide in germinating seeds. AtrbohB pre-mRNA is alternatively spliced in seeds in a hormonally and developmentally regulated manner. ABA caused accumulation of AtrbohB- mRNA and prevented prevented AtrbohB-a mRNA expression in fresh seeds.	respiratory burst oxidase homolog B (RBOHB); FUNCTIONS IN: NAD(P)H oxidase activity; INVOLVED IN: response to heat, seed germination, defense response; LOCATED IN: integral to membrane, membrane; EXPRESSED IN: embryo, root; EXPRESSED DURING: imbibition; CONTAINS InterPro DOMAIN/s: Ferredoxin reductase-type FAD-binding domain (InterPro:IPR017927), Cytochrome b245, heavy chain (InterPro:IPR000778),…	-0.810396	9.83645e-21	-0.874164	1.89535e-27
Solyc08g076220.3.1	ME10	0	Phosphoribulokinase (AHRD V3.3 *** A0A1U8GUA7_CAPAN)	AT1G32060.1	80.84	0	676	phosphoribulokinase	0	phosphoribulokinase (PRK); FUNCTIONS IN: protein binding, phosphoribulokinase activity, ATP binding; INVOLVED IN: response to cold, defense response to bacterium, biosynthetic process, peptidyl-cysteine S-nitrosylation; LOCATED IN: in 8 components; EXPRESSED IN: 24 plant structures; EXPRESSED DURING: 15 growth stages; CONTAINS InterPro DOMAIN/s: Phosphoribulokinase/uridine kinase (InterPro:IPR006…	-0.875003	1.46609e-27	-0.878794	4.48599e-28	gonzalez
Solyc06g051400.3.1	ME10	0	omega-3 fatty acid desaturase	AT5G05580.1	75.23	0	686	fatty acid desaturase 8	Encodes a temperature sensitive plastidic fatty acid desaturase.	fatty acid desaturase 8 (FAD8); FUNCTIONS IN: omega-3 fatty acid desaturase activity; INVOLVED IN: response to temperature stimulus, fatty acid biosynthetic process; LOCATED IN: chloroplast, chloroplast envelope; CONTAINS InterPro DOMAIN/s: Protein of unknown function DUF3474 (InterPro:IPR021863), Fatty acid desaturase, type 1 (InterPro:IPR005804); BEST Arabidopsis thaliana protein match is: fatt…	-0.823888	6.3641e-22	-0.884053	8.11429e-29	gonzalez
Solyc11g013890.1.1	ME10	1	F-box associated domain, type 1 (AHRD V3.3 *** A0A2U1K9Q2_ARTAN)	NA	NA	NA	NA	NA	NA	NA	-0.797384	1.12982e-19	-0.887647	2.40305e-29	terrasson
Solyc05g006030.3.1	ME10	1	D-ribose-binding periplasmic (AHRD V3.3 *** A0A0B0Q0N1_GOSAR)	AT1G60010.1	59.77	9e-66	202	0	0	unknown protein; FUNCTIONS IN: molecular_function unknown; INVOLVED IN: N-terminal protein myristoylation; LOCATED IN: cellular_component unknown; EXPRESSED IN: 22 plant structures; EXPRESSED DURING: 13 growth stages; BEST Arabidopsis thaliana protein match is: unknown protein (TAIR:AT1G10530.1); Has 185 Blast hits to 185 proteins in 18 species: Archae - 0; Bacteria - 0; Metazoa - 0; Fungi - 3; P…	-0.666134	4.68243e-12	-0.887795	2.28347e-29	both
Solyc01g079790.4.1	ME10	1	ADP-glucose pyrophosphorylase large subunit 3	AT5G19220.1	79.24	0	857	ADP glucose pyrophosphorylase large subunit 1	Encodes the large subunit of ADP-glucose pyrophosphorylase which catalyzes the first, rate limiting step in starch biosynthesis. The large subunit plays a regulatory role whereas the small subunit (ApS) is the catalytic isoform. Four isoforms (ApL1-4) have been identified. ApL1 is the major large subunit isoform present in leaves. Mutational analysis of APS1 suggests that APL1 and APL2 can compen…	ADP glucose pyrophosphorylase large subunit 1 (APL1); FUNCTIONS IN: glucose-1-phosphate adenylyltransferase activity; INVOLVED IN: cellulose biosynthetic process, biosynthetic process, glycogen biosynthetic process; LOCATED IN: chloroplast, chloroplast stroma, chloroplast envelope; EXPRESSED IN: 26 plant structures; EXPRESSED DURING: 14 growth stages; CONTAINS InterPro DOMAIN/s: Glucose-1-phospha…	-0.787756	6.15347e-19	-0.8923	4.66985e-30	gonzalez
Solyc02g080070.3.1	ME10	1	Cysteine-rich receptor-like protein kinase 29 (AHRD V3.3 *** A0A2G2XFA8_CAPBA)	AT4G23180.1	49.02	0	586	cysteine-rich RLK (RECEPTOR-like protein kinase) 10	Encodes a receptor-like protein kinase. Naming convention from Chen et al 2003 (PMID 14756307)	cysteine-rich RLK (RECEPTOR-like protein kinase) 10 (CRK10); FUNCTIONS IN: protein serine/threonine kinase activity, protein kinase activity, kinase activity, ATP binding; INVOLVED IN: protein amino acid phosphorylation; LOCATED IN: plasma membrane; EXPRESSED IN: 22 plant structures; EXPRESSED DURING: 13 growth stages; CONTAINS InterPro DOMAIN/s: Protein kinase, ATP binding site (InterPro:IPR0174…	-0.779856	2.31833e-18	-0.892939	3.70703e-30
Solyc08g078300.4.1	ME10	0	Homeobox-leucine zipper protein HAT4 (AHRD V3.3 *** A0A2G2XL32_CAPBA)	AT4G16780.1	63.05	4e-107	317	homeobox protein 2	Encodes a homeodomain-leucine zipper protein that is rapidly and strongly induced by changes in the ratio of red to far-red light. It is also involved in cell expansion and cell proliferation and in the response to auxin.	homeobox protein 2 (HB-2); CONTAINS InterPro DOMAIN/s: HD-ZIP protein, N-terminal (InterPro:IPR006712), Helix-turn-helix motif, lambda-like repressor (InterPro:IPR000047), Homeobox (InterPro:IPR001356), Homeobox, conserved site (InterPro:IPR017970), Homeodomain-like (InterPro:IPR009057), Leucine zipper, homeobox-associated (InterPro:IPR003106), Homeodomain-related (InterPro:IPR012287); BEST Arabi…	-0.883568	9.53355e-29	-0.894537	2.06813e-30
Solyc04g005040.1.1	ME10	1	Metalloendoproteinase 1 (AHRD V3.3 *** A0A1J3JDB5_NOCCA)	AT1G24140.1	53.73	9e-139	404	Matrixin family protein	0	Matrixin family protein; FUNCTIONS IN: metallopeptidase activity, metalloendopeptidase activity, zinc ion binding; INVOLVED IN: proteolysis, metabolic process; LOCATED IN: anchored to membrane; EXPRESSED IN: 13 plant structures; EXPRESSED DURING: 7 growth stages; CONTAINS InterPro DOMAIN/s: Peptidase M10, metallopeptidase (InterPro:IPR001818), Peptidoglycan binding-like (InterPro:IPR002477), Pept…	-0.808896	1.3157e-20	-0.898884	4.02553e-31
Solyc07g061790.3.1	ME10	0	Heme-binding protein 2-like (AHRD V3.3 *** A0A2K3NGA7_TRIPR)	AT1G17100.1	61.62	2e-89	268	SOUL heme-binding family protein	0	SOUL heme-binding family protein; FUNCTIONS IN: binding; INVOLVED IN: biological_process unknown; LOCATED IN: plasma membrane, vacuole; EXPRESSED IN: 24 plant structures; EXPRESSED DURING: 14 growth stages; CONTAINS InterPro DOMAIN/s: SOUL haem-binding protein (InterPro:IPR006917); BEST Arabidopsis thaliana protein match is: SOUL heme-binding family protein (TAIR:AT1G78450.1); Has 1318 Blast hits…	-0.811618	7.74558e-21	-0.899858	2.76159e-31
Solyc08g080700.3.1	ME10	0	NEP-interacting protein, putative (DUF239) (AHRD V3.3 *** Q1PE81_ARATH)	AT4G15050.1	37.34	7e-70	229	Protein of Unknown Function (DUF239)	0	Protein of Unknown Function (DUF239); INVOLVED IN: biological_process unknown; LOCATED IN: endomembrane system; CONTAINS InterPro DOMAIN/s: Protein of unknown function DUF239, plant (InterPro:IPR004314); BEST Arabidopsis thaliana protein match is: Protein of Unknown Function (DUF239) (TAIR:AT1G10190.1); Has 633 Blast hits to 604 proteins in 22 species: Archae - 0; Bacteria - 7; Metazoa - 0; Fungi…	-0.853769	5.85266e-25	-0.89994	2.67531e-31
Solyc01g058720.4.1	ME10	1	Calcium-binding EF-hand (AHRD V3.3 *** A0A2U1NQC6_ARTAN)	AT5G49480.1	48.3	1e-39	134	Ca2+-binding protein 1	AtCP1 encodes a novel Ca2+-binding protein, which shares sequence similarities with calmodulins. The expression of AtCP1 is induced by NaCl.	Ca2+-binding protein 1 (CP1); FUNCTIONS IN: calcium ion binding; INVOLVED IN: hyperosmotic salinity response; LOCATED IN: cytosol; EXPRESSED IN: 25 plant structures; EXPRESSED DURING: 14 growth stages; CONTAINS InterPro DOMAIN/s: EF-Hand 1, calcium-binding site (InterPro:IPR018247), EF-HAND 2 (InterPro:IPR018249), EF-hand-like domain (InterPro:IPR011992), Calcium-binding EF-hand (InterPro:IPR0020…	-0.752873	1.4676e-16	-0.903745	5.8998e-32
Solyc10g085750.2.1	ME10	0	Polyadenylate-binding protein (AHRD V3.3 *** A0A2G3BFC7_CAPCH)	AT2G36660.1	53.03	0	605	poly(A) binding protein 7	polyadenylate-binding protein, putative / PABP, putative. Member of the class III family of PABP proteins.	poly(A) binding protein 7 (PAB7); CONTAINS InterPro DOMAIN/s: Polyadenylate-binding protein/Hyperplastic disc protein (InterPro:IPR002004), RNA recognition motif, RNP-1 (InterPro:IPR000504), Polyadenylate binding protein, human types 1, 2, 3, 4 (InterPro:IPR006515), Nucleotide-binding, alpha-beta plait (InterPro:IPR012677); BEST Arabidopsis thaliana protein match is: poly(A) binding protein 2 (TA…	-0.897434	7.00493e-31	-0.905424	2.96809e-32
Solyc01g098590.3.1	ME10	1	Phosphoglycerate mutase-like protein AT74 (AHRD V3.3 *** A0A2G2YZL9_CAPAN)	AT3G05170.1	52.03	2e-93	283	Phosphoglycerate mutase family protein	0	Phosphoglycerate mutase family protein; FUNCTIONS IN: catalytic activity; INVOLVED IN: metabolic process; LOCATED IN: cellular_component unknown; EXPRESSED IN: 17 plant structures; EXPRESSED DURING: 6 growth stages; CONTAINS InterPro DOMAIN/s: Histidine phosphatase superfamily, clade-1 (InterPro:IPR013078), Phosphoglycerate/bisphosphoglycerate mutase, active site (InterPro:IPR001345); BEST Arabid…	-0.703018	8.98497e-14	-0.906598	1.82116e-32
Solyc03g120170.1.1	ME10	1	Protein kinase, catalytic domain-containing protein (AHRD V3.3 -** A0A2U1L8L5_ARTAN)	NA	NA	NA	NA	NA	NA	NA	-0.840827	1.44225e-23	-0.908084	9.72929e-33
Solyc06g054510.4.1	ME10	1	Acyl carrier protein (AHRD V3.3 *** A0A1U8GVI0_CAPAN)	AT4G25050.1	57.26	5e-40	137	acyl carrier protein 4	encodes an acyl carrier protein predominantly expressed in leaves. Gene expression is upregulated by light.	acyl carrier protein 4 (ACP4); FUNCTIONS IN: acyl carrier activity; INVOLVED IN: response to light stimulus, fatty acid biosynthetic process; LOCATED IN: chloroplast stroma, chloroplast, chloroplast envelope; EXPRESSED IN: 22 plant structures; EXPRESSED DURING: 14 growth stages; CONTAINS InterPro DOMAIN/s: Phosphopantetheine-binding (InterPro:IPR006163), Acyl carrier protein (ACP) (InterPro:IPR00…	-0.813625	5.21267e-21	-0.912822	1.22377e-33
Solyc02g078500.2.1	ME10	1	Aluminum induced protein with YGL and LRDR motifs (AHRD V3.3 *** Q9FG81_ARATH)	AT4G27450.1	63.86	4e-115	335	Aluminium induced protein with YGL and LRDR motifs	0	Aluminium induced protein with YGL and LRDR motifs; FUNCTIONS IN: molecular_function unknown; INVOLVED IN: biological_process unknown; LOCATED IN: cytosol, nucleus, plasma membrane; EXPRESSED IN: 25 plant structures; EXPRESSED DURING: 14 growth stages; BEST Arabidopsis thaliana protein match is: Aluminium induced protein with YGL and LRDR motifs (TAIR:AT3G15450.1); Has 30201 Blast hits to 17322 p…	-0.823568	6.80828e-22	-0.913515	8.94857e-34	terrasson
Solyc02g067680.1.1	ME10	1	RING/U-box superfamily protein (AHRD V3.3 *** A0A2U1N3Q0_ARTAN)	AT5G40250.1	54.31	4e-122	362	RING/U-box superfamily protein	0	RING/U-box superfamily protein; FUNCTIONS IN: zinc ion binding; EXPRESSED IN: 22 plant structures; EXPRESSED DURING: 13 growth stages; CONTAINS InterPro DOMAIN/s: Zinc finger, RING-type (InterPro:IPR001841), Zinc finger, C3HC4 RING-type (InterPro:IPR018957); BEST Arabidopsis thaliana protein match is: RING/U-box superfamily protein (TAIR:AT1G23980.1); Has 9426 Blast hits to 9402 proteins in 296 s…	-0.821039	1.15641e-21	-0.916802	1.95348e-34
Solyc08g068600.3.1	ME10	1	Serine decarboxylase (AHRD V3.3 *** A0A2G2W5V8_CAPBA)	AT1G43710.1	59.95	0	541	Pyridoxal phosphate (PLP)-dependent transferases superfamily protein	0	embryo defective 1075 (emb1075); FUNCTIONS IN: pyridoxal phosphate binding, carboxy-lyase activity, catalytic activity; INVOLVED IN: cellular amino acid metabolic process, embryo development ending in seed dormancy; LOCATED IN: cellular_component unknown; EXPRESSED IN: 25 plant structures; EXPRESSED DURING: 15 growth stages; CONTAINS InterPro DOMAIN/s: Pyridoxal phosphate-dependent transferase, m…	-0.745373	4.23437e-16	-0.91703	1.75375e-34
Solyc07g018010.3.1	ME10	1	bHLH transcription factor139	AT5G57150.1	56.69	1e-86	262	basic helix-loop-helix (bHLH) DNA-binding superfamily protein	0	basic helix-loop-helix (bHLH) DNA-binding superfamily protein; FUNCTIONS IN: DNA binding, sequence-specific DNA binding transcription factor activity; INVOLVED IN: regulation of transcription; LOCATED IN: nucleus; EXPRESSED IN: 24 plant structures; EXPRESSED DURING: 14 growth stages; CONTAINS InterPro DOMAIN/s: Helix-loop-helix DNA-binding domain (InterPro:IPR001092), Helix-loop-helix DNA-binding…	-0.86596	2.12863e-26	-0.917571	1.35584e-34
Solyc06g072070.2.1	ME10	1	Transmembrane protein, putative (DUF 3339) (AHRD V3.3 *** Q9SMN3_ARATH)	AT3G48660.1	75.36	2e-33	113	Protein of unknown function (DUF 3339)	0	Protein of unknown function (DUF 3339); FUNCTIONS IN: molecular_function unknown; INVOLVED IN: biological_process unknown; LOCATED IN: endomembrane system; CONTAINS InterPro DOMAIN/s: Protein of unknown function DUF3339 (InterPro:IPR021775); BEST Arabidopsis thaliana protein match is: Protein of unknown function (DUF 3339) (TAIR:AT5G63500.1); Has 274 Blast hits to 269 proteins in 15 species: Arch…	-0.854746	4.53883e-25	-0.918019	1.09422e-34
Solyc09g008080.3.1	ME10	1	Ubiquitin domain-containing protein (AHRD V3.3 --* A0A1Q3C6U9_CEPFO)	NA	NA	NA	NA	NA	NA	NA	-0.795135	1.69217e-19	-0.918178	1.01375e-34
Solyc05g009320.4.1	ME10	0	LOB domain-containing protein 40 (AHRD V3.3 *** A0A2G2VK71_CAPBA)	AT3G02550.1	55.24	6e-70	220	LOB domain-containing protein 41	0	LOB domain-containing protein 41 (LBD41); CONTAINS InterPro DOMAIN/s: Lateral organ boundaries, LOB (InterPro:IPR004883), Asymmetric leaves, AS2/LOB (InterPro:IPR017414); BEST Arabidopsis thaliana protein match is: LOB domain-containing protein 40 (TAIR:AT1G67100.1); Has 601 Blast hits to 600 proteins in 23 species: Archae - 0; Bacteria - 0; Metazoa - 0; Fungi - 0; Plants - 601; Viruses - 0; Othe…	-0.80518	2.67544e-20	-0.918923	7.07438e-35
Solyc05g005160.3.1	ME10	1	ATP-citrate synthase (AHRD V3.3 *** B6TD54_MAIZE)	AT1G60810.2	87.47	0	783	NA	NA	NA	-0.804227	3.20157e-20	-0.920803	2.80818e-35
Solyc08g066360.3.1	ME10	1	Malic enzyme (AHRD V3.3 *** A0A2G2W5J3_CAPBA)	AT1G79750.1	82.38	0	1001	NADP-malic enzyme 4	The malic enzyme (EC 1.1.1.40) encoded by AtNADP-ME4 is localized to chloroplasts. The gene is expressed throughout the whole plant and during embryogenesis and germination. A possible involvement in the fatty acid biosynthesis has been proposed.	NADP-malic enzyme 4 (NADP-ME4); CONTAINS InterPro DOMAIN/s: Malic enzyme, NAD-binding (InterPro:IPR012302), Malic oxidoreductase (InterPro:IPR001891), Malic enzyme, conserved site (InterPro:IPR015884), Malic enzyme, N-terminal (InterPro:IPR012301), NAD(P)-binding domain (InterPro:IPR016040); BEST Arabidopsis thaliana protein match is: NADP-malic enzyme 3 (TAIR:AT5G25880.1); Has 9573 Blast hits to…	-0.795768	1.5112e-19	-0.922281	1.33649e-35
Solyc04g007900.3.1	ME10	1	protein PLANT CADMIUM RESISTANCE 2-like (AHRD V3.3 *** A0A2G2ZHD1_CAPAN)	AT1G14870.1	60.78	6e-61	190	PLANT CADMIUM RESISTANCE 2	0	PLANT CADMIUM RESISTANCE 2 (PCR2); FUNCTIONS IN: molecular_function unknown; INVOLVED IN: response to oxidative stress; LOCATED IN: plasma membrane; EXPRESSED IN: callus; CONTAINS InterPro DOMAIN/s: Protein of unknown function Cys-rich (InterPro:IPR006461); BEST Arabidopsis thaliana protein match is: PLAC8 family protein (TAIR:AT5G35525.1); Has 803 Blast hits to 802 proteins in 112 species: Archa…	-0.719248	1.29502e-14	-0.923842	6.00453e-36
Solyc07g055810.3.1	ME10	1	LRR_1 domain-containing protein/Pkinase_Tyr domain-containing protein/Malectin domain-containing protein/LRR_8 domain-containing protein (AHRD V3.3 *** A0A1Q3C610_CEPFO)	AT1G07650.1	63.78	0	1260	Leucine-rich repeat transmembrane protein kinase	0	Leucine-rich repeat transmembrane protein kinase; FUNCTIONS IN: protein serine/threonine kinase activity, kinase activity, ATP binding; INVOLVED IN: protein amino acid phosphorylation, transmembrane receptor protein tyrosine kinase signaling pathway; LOCATED IN: endomembrane system; EXPRESSED IN: 22 plant structures; EXPRESSED DURING: 13 growth stages; BEST Arabidopsis thaliana protein match is: …	-0.792985	2.47852e-19	-0.924512	4.23716e-36
Solyc06g016790.3.1	ME10	0	proline-rich receptor-like protein kinase PERK13 (AHRD V3.3 *** XP_004240680.1)	NA	NA	NA	NA	NA	NA	NA	-0.847701	2.7288e-24	-0.924824	3.59722e-36
Solyc03g031420.1.1	ME10	1	molybdenum cofactor sulfurase (AHRD V3.3 *** A0A2I4FGR8_9ROSI)	AT5G51920.1	51.13	0	579	Pyridoxal phosphate (PLP)-dependent transferases superfamily protein	0	Pyridoxal phosphate (PLP)-dependent transferases superfamily protein; FUNCTIONS IN: pyridoxal phosphate binding, catalytic activity; INVOLVED IN: metabolic process; LOCATED IN: chloroplast; CONTAINS InterPro DOMAIN/s: Pyridoxal phosphate-dependent transferase, major domain (InterPro:IPR015424), Aminotransferase, class V/Cysteine desulfurase (InterPro:IPR000192), Pyridoxal phosphate-dependent tran…	-0.853148	6.87398e-25	-0.924946	3.37381e-36
Solyc10g079970.2.1	ME10	0	Transmembrane protein 19 (AHRD V3.3 *** A0A1J3EWI5_NOCCA)	AT5G19930.2	71.12	5e-139	398	Protein of unknown function DUF92, transmembrane	0	Protein of unknown function DUF92, transmembrane; LOCATED IN: endomembrane system; EXPRESSED IN: 24 plant structures; EXPRESSED DURING: 13 growth stages; CONTAINS InterPro DOMAIN/s: Protein of unknown function DUF92, transmembrane (InterPro:IPR002794).	-0.732414	2.42834e-15	-0.925434	2.60769e-36	gonzalez
Solyc04g078590.3.1	ME10	1	Leucine-rich repeat protein kinase family protein (AHRD V3.3 *** Q9FMI2_ARATH)	AT5G43020.1	58.39	0	706	Leucine-rich repeat protein kinase family protein	0	Leucine-rich repeat protein kinase family protein; FUNCTIONS IN: protein serine/threonine kinase activity, kinase activity, ATP binding; INVOLVED IN: transmembrane receptor protein tyrosine kinase signaling pathway, protein amino acid phosphorylation; LOCATED IN: endomembrane system; EXPRESSED IN: 21 plant structures; EXPRESSED DURING: 13 growth stages; CONTAINS InterPro DOMAIN/s: Protein kinase,…	-0.891597	6.0108e-30	-0.926329	1.61879e-36	gonzalez
Solyc06g051930.3.1	ME10	1	Pyruvate kinase (AHRD V3.3 *** A0A1S5VK12_DIOKA)	AT3G49160.3	58.5	0	706	NA	NA	NA	-0.824281	5.85569e-22	-0.928184	5.9068e-37
Solyc03g083100.3.1	ME10	1	SUN-like protein 10	AT3G49260.4	46.19	1e-84	273	NA	NA	NA	-0.856897	2.57542e-25	-0.929987	2.16015e-37	gonzalez
Solyc03g044220.1.1	ME10	1	F-box protein (AHRD V3.3 *** A0A2G2XGV7_CAPBA)	AT5G67250.1	59.4	0	539	SKP1/ASK1-interacting protein 2	Encodes an SKP1 interacting partner (SKIP2).Encodes an F-box protein. Based on genetic analysis appears to be functionally redundant with VFB1,2, and 3. When expression of all 4 genes is reduced plants show defects in growth and reduced expression of auxin response genes.	SKP1/ASK1-interacting protein 2 (SKIP2); FUNCTIONS IN: ubiquitin-protein ligase activity; INVOLVED IN: N-terminal protein myristoylation; LOCATED IN: cytoplasm; EXPRESSED IN: 25 plant structures; EXPRESSED DURING: 14 growth stages; CONTAINS InterPro DOMAIN/s: F-box domain, cyclin-like (InterPro:IPR001810), F-box domain, Skp2-like (InterPro:IPR022364); BEST Arabidopsis thaliana protein match is: V…	-0.850688	1.28976e-24	-0.933091	3.58359e-38
Solyc01g106100.2.1	ME10	1	Zein-binding domain-containing protein (AHRD V3.3 *** A0A1Q3CXG5_CEPFO)	NA	NA	NA	NA	NA	NA	NA	-0.829542	1.88332e-22	-0.9331	3.56322e-38
Solyc04g082510.3.1	ME10	0	Protein kinase (AHRD V3.3 *** S8D6E4_9LAMI)	AT1G20650.1	65.12	4e-173	492	Protein kinase superfamily protein	0	Protein kinase superfamily protein; FUNCTIONS IN: protein serine/threonine kinase activity, protein kinase activity, ATP binding; INVOLVED IN: protein amino acid phosphorylation; LOCATED IN: cellular_component unknown; EXPRESSED IN: 22 plant structures; EXPRESSED DURING: 13 growth stages; CONTAINS InterPro DOMAIN/s: Protein kinase, ATP binding site (InterPro:IPR017441), Protein kinase, catalytic …	-0.820356	1.33208e-21	-0.933366	3.04203e-38
Solyc03g044510.3.1	ME10	0	P-loop containing nucleoside triphosphate hydrolases superfamily protein (AHRD V3.3 *** F4JKP9_ARATH)	AT2G15730.1	65.2	6e-170	481	P-loop containing nucleoside triphosphate hydrolases superfamily protein	0	P-loop containing nucleoside triphosphate hydrolases superfamily protein; BEST Arabidopsis thaliana protein match is: P-loop containing nucleoside triphosphate hydrolases superfamily protein (TAIR:AT4G34420.1); Has 149 Blast hits to 147 proteins in 26 species: Archae - 0; Bacteria - 31; Metazoa - 0; Fungi - 0; Plants - 118; Viruses - 0; Other Eukaryotes - 0 (source: NCBI BLink).	-0.904253	4.79812e-32	-0.93373	2.44835e-38
Solyc02g068315.1.1	ME10	1	2-oxoglutarate (2OG) and Fe(II)-dependent oxygenase superfamily protein (AHRD V3.3 *** Q9XI75_ARATH)	AT1G14130.1	58.98	1e-120	352	2-oxoglutarate (2OG) and Fe(II)-dependent oxygenase superfamily protein	0	2-oxoglutarate (2OG) and Fe(II)-dependent oxygenase superfamily protein; FUNCTIONS IN: oxidoreductase activity, acting on paired donors, with incorporation or reduction of molecular oxygen, 2-oxoglutarate as one donor, and incorporation of one atom each of oxygen into both donors, oxidoreductase activity; INVOLVED IN: biological_process unknown; LOCATED IN: nucleus; EXPRESSED IN: 23 plant structu…	-0.720867	1.0595e-14	-0.934853	1.24283e-38
Solyc02g079030.3.1	ME10	1	Sphingosine kinase (AHRD V3.3 *** A0A218NG31_TOBAC)	AT4G21540.1	60.43	0	604	sphingosine kinase 1	Encodes a sphingosine kinase, also has enzyme activity towards other plant long-chain sphingoid bases. Involved in guard cell ABA signalling and seed germination.	sphingosine kinase 1 (SPHK1); FUNCTIONS IN: diacylglycerol kinase activity, sphinganine kinase activity, D-erythro-sphingosine kinase activity; INVOLVED IN: activation of protein kinase C activity by G-protein coupled receptor protein signaling pathway, seed germination, response to abscisic acid stimulus; LOCATED IN: plant-type vacuole membrane, vacuole; CONTAINS InterPro DOMAIN/s: Diacylglycero…	-0.800035	6.97228e-20	-0.93757	2.28969e-39	terrasson
Solyc06g071280.4.1	ME10	1	Enhanced disease susceptibility 1 protein (AHRD V3.3 *** Q2TQV0_SOLTU)	AT3G48090.1	42.47	6e-157	469	alpha/beta-Hydrolases superfamily protein	Component of R gene-mediated disease resistance in Arabidopsis thaliana with homology to eukaryotic lipases.	enhanced disease susceptibility 1 (EDS1); CONTAINS InterPro DOMAIN/s: Lipase, class 3 (InterPro:IPR002921); BEST Arabidopsis thaliana protein match is: alpha/beta-Hydrolases superfamily protein (TAIR:AT3G48080.1); Has 536 Blast hits to 485 proteins in 45 species: Archae - 0; Bacteria - 4; Metazoa - 2; Fungi - 2; Plants - 491; Viruses - 0; Other Eukaryotes - 37 (source: NCBI BLink).	-0.794435	1.91706e-19	-0.937794	1.98456e-39
Solyc08g079740.3.1	ME10	1	Leucine-rich receptor-like protein kinase family protein (AHRD V3.3 *** A0A0K9NNG1_ZOSMR)	AT1G12460.1	63.13	0	1090	Leucine-rich repeat protein kinase family protein	0	Leucine-rich repeat protein kinase family protein; FUNCTIONS IN: protein serine/threonine kinase activity, kinase activity, ATP binding; INVOLVED IN: transmembrane receptor protein tyrosine kinase signaling pathway, protein amino acid phosphorylation; LOCATED IN: plasma membrane; EXPRESSED IN: 9 plant structures; EXPRESSED DURING: 6 growth stages; CONTAINS InterPro DOMAIN/s: Protein kinase, catal…	-0.89853	4.61258e-31	-0.938374	1.3676e-39
Solyc10g011940.1.1	ME10	1	SNF2_N domain-containing protein/Chromo domain-containing protein (AHRD V3.3 *-* A0A1Q3BJ60_CEPFO)	AT5G44800.1	27.17	1e-51	200	chromatin remodeling 4	0	chromatin remodeling 4 (CHR4); FUNCTIONS IN: in 6 functions; INVOLVED IN: chromatin assembly or disassembly, regulation of transcription; LOCATED IN: chromatin, nucleus; EXPRESSED IN: 24 plant structures; EXPRESSED DURING: 11 growth stages; CONTAINS InterPro DOMAIN/s: Protein of unknown function DUF1087 (InterPro:IPR009463), Zinc finger, PHD-type, conserved site (InterPro:IPR019786), Zinc finger,…	-0.829949	1.72212e-22	-0.938635	1.15515e-39
Solyc02g086300.4.1	ME10	1	Class I glutamine amidotransferase-like superfamily protein (AHRD V3.3 *** A0A2U1KIC9_ARTAN)	AT5G38200.1	70.47	1e-132	386	Class I glutamine amidotransferase-like superfamily protein	0	Class I glutamine amidotransferase-like superfamily protein; FUNCTIONS IN: hydrolase activity; INVOLVED IN: glutamine metabolic process; LOCATED IN: cellular_component unknown; CONTAINS InterPro DOMAIN/s: Peptidase C26 (InterPro:IPR011697), Glutamine amidotransferase type 1 (InterPro:IPR017926); BEST Arabidopsis thaliana protein match is: Class I glutamine amidotransferase-like superfamily protei…	-0.797441	1.11827e-19	-0.939141	8.30973e-40	both
Solyc04g073970.4.1	ME10	0	PUF domain-containing protein/DUF4057 domain-containing protein (AHRD V3.3 *-* A0A1Q3AUK4_CEPFO)	AT1G78150.2	65.16	8e-119	346	0	0	unknown protein; BEST Arabidopsis thaliana protein match is: unknown protein (TAIR:AT1G35780.1); Has 35333 Blast hits to 34131 proteins in 2444 species: Archae - 798; Bacteria - 22429; Metazoa - 974; Fungi - 991; Plants - 531; Viruses - 0; Other Eukaryotes - 9610 (source: NCBI BLink).	-0.854622	4.68813e-25	-0.940951	2.49994e-40
Solyc08g005240.3.1	ME10	0	Transcription factor jumonji (Jmj) family protein / zinc finger (C5HC2 type) family protein (AHRD V3.3 *** F4KIX0_ARATH)	AT5G46910.1	59.47	0	796	Transcription factor jumonji (jmj) family protein / zinc finger (C5HC2 type) family protein	0	Transcription factor jumonji (jmj) family protein / zinc finger (C5HC2 type) family protein; FUNCTIONS IN: sequence-specific DNA binding transcription factor activity; INVOLVED IN: response to chitin, regulation of transcription; LOCATED IN: nucleus; EXPRESSED IN: 24 plant structures; EXPRESSED DURING: 14 growth stages; CONTAINS InterPro DOMAIN/s: Transcription factor jumonji/aspartyl beta-hydrox…	-0.801323	5.50027e-20	-0.941524	1.69484e-40
Solyc09g007800.3.1	ME10	1	acyl-CoA-binding domain protein (AHRD V3.3 *-* AT2G37195.2)	AT2G37195.1	53.08	3e-33	117	0	0	unknown protein; FUNCTIONS IN: molecular_function unknown; INVOLVED IN: biological_process unknown; LOCATED IN: endomembrane system; Has 23 Blast hits to 23 proteins in 10 species: Archae - 0; Bacteria - 0; Metazoa - 0; Fungi - 0; Plants - 23; Viruses - 0; Other Eukaryotes - 0 (source: NCBI BLink).	-0.784872	1.00511e-18	-0.948013	1.55383e-42
Solyc03g116360.2.1	ME10	1	Regulator of chromosome condensation (RCC1) family protein (AHRD V3.3 *** A0A1I9LLL7_ARATH)	AT5G19420.1	50.81	0	863	Regulator of chromosome condensation (RCC1) family with FYVE zinc finger domain	0	Regulator of chromosome condensation (RCC1) family with FYVE zinc finger domain; FUNCTIONS IN: chromatin binding, zinc ion binding, Ran GTPase binding; EXPRESSED IN: 22 plant structures; EXPRESSED DURING: 13 growth stages; CONTAINS InterPro DOMAIN/s: Regulator of chromosome condensation, RCC1 (InterPro:IPR000408), Disease resistance/zinc finger/chromosome condensation-like region (InterPro:IPR013…	-0.789416	4.62285e-19	-0.948202	1.3433e-42
Solyc08g008410.3.1	ME10	1	Plant regulator RWP-RK family protein (AHRD V3.3 *** G7IAL8_MEDTR)	AT4G24020.1	53.45	0	923	NIN like protein 7	Encodes NIN Like Protein 7 (NLP7). Modulates nitrate sensing and metabolism. Mutants of NLP7 show features of nitrogen-starved plants and are tolerant to drought stress. Localized in the nucleus and functions as a putative transcription factor.	NIN like protein 7 (NLP7); CONTAINS InterPro DOMAIN/s: Octicosapeptide/Phox/Bem1p (InterPro:IPR000270), Plant regulator RWP-RK (InterPro:IPR003035); BEST Arabidopsis thaliana protein match is: Plant regulator RWP-RK family protein (TAIR:AT1G64530.1); Has 724 Blast hits to 614 proteins in 51 species: Archae - 0; Bacteria - 2; Metazoa - 5; Fungi - 15; Plants - 632; Viruses - 0; Other Eukaryotes - 7…	-0.791749	3.07962e-19	-0.950179	2.83316e-43
Solyc03g111610.3.1	ME10	1	Haloacid dehalogenase-like hydrolase domain-containing protein (AHRD V3.3 *** A0A2G3CCT0_CAPCH),Pfam:PF13419	AT3G48420.1	80.76	2e-163	462	Haloacid dehalogenase-like hydrolase (HAD) superfamily protein	0	Haloacid dehalogenase-like hydrolase (HAD) superfamily protein; FUNCTIONS IN: hydrolase activity, catalytic activity; INVOLVED IN: metabolic process; LOCATED IN: chloroplast, chloroplast stroma, chloroplast envelope; EXPRESSED IN: 22 plant structures; EXPRESSED DURING: 14 growth stages; CONTAINS InterPro DOMAIN/s: Haloacid dehalogenase-like hydrolase (InterPro:IPR005834), HAD-superfamily hydrolas…	-0.836877	3.6251e-23	-0.954143	1.02394e-44
Solyc11g007940.2.1	ME10	1	Protein BTR1 (AHRD V3.3 *** A0A2G2VF13_CAPBA)	AT5G04430.1	60.98	9e-131	380	binding to TOMV RNA 1L (long form)	Gene model AT5G04430.1 produces active protein. (BTS1S). Binds to ToMV genomic RNA and prevents viral multiplication.	BINDING TO TOMV RNA 1S (SHORT FORM) (BTR1S); FUNCTIONS IN: single-stranded RNA binding, nucleic acid binding; INVOLVED IN: RNA splicing, regulation of viral protein levels in host cell; LOCATED IN: cellular_component unknown; EXPRESSED IN: 24 plant structures; EXPRESSED DURING: 14 growth stages; CONTAINS InterPro DOMAIN/s: K Homology, type 1, subgroup (InterPro:IPR018111), K Homology (InterPro:IP…	-0.820817	1.21081e-21	-0.954175	9.96271e-45
Solyc01g088660.3.1	ME10	1	FCS-Like Zinc finger 3 (AHRD V3.3 *** FLZ3_ARATH)	AT2G44670.1	53.54	3e-28	101	Protein of unknown function (DUF581)	0	Protein of unknown function (DUF581); CONTAINS InterPro DOMAIN/s: Protein of unknown function DUF581 (InterPro:IPR007650); BEST Arabidopsis thaliana protein match is: Protein of unknown function (DUF581) (TAIR:AT4G17670.1); Has 521 Blast hits to 521 proteins in 19 species: Archae - 0; Bacteria - 0; Metazoa - 0; Fungi - 0; Plants - 521; Viruses - 0; Other Eukaryotes - 0 (source: NCBI BLink).	-0.794059	2.04951e-19	-0.958627	1.64835e-46
Solyc10g080360.1.1	ME10	1	Unknown protein	NA	NA	NA	NA	NA	NA	NA	-0.796197	1.3992e-19	-0.959726	5.58951e-47
Solyc06g060740.3.1	ME10	1	Zinc finger protein (AHRD V3.3 *** A0A200PXY0_9MAGN)	AT3G60580.1	32.84	2e-41	148	C2H2-like zinc finger protein	0	C2H2-like zinc finger protein; FUNCTIONS IN: sequence-specific DNA binding transcription factor activity, zinc ion binding, nucleic acid binding; INVOLVED IN: regulation of transcription; LOCATED IN: intracellular; EXPRESSED IN: 7 plant structures; EXPRESSED DURING: M germinated pollen stage, 4 anthesis, petal differentiation and expansion stage; CONTAINS InterPro DOMAIN/s: Zinc finger, C2H2-like…	-0.871352	4.42375e-27	-0.964593	3.13082e-49
Solyc12g017450.2.1	ME10	1	Ubiquitin-specific protease family C19 protein (AHRD V3.3 *** A0A2K3NKS0_TRIPR)	AT1G16860.1	68.74	0	667	Ubiquitin-specific protease family C19-related protein	0	Ubiquitin-specific protease family C19-related protein; LOCATED IN: plasma membrane; BEST Arabidopsis thaliana protein match is: Ubiquitin-specific protease family C19-related protein (TAIR:AT1G78880.1); Has 605 Blast hits to 295 proteins in 85 species: Archae - 0; Bacteria - 22; Metazoa - 26; Fungi - 28; Plants - 169; Viruses - 0; Other Eukaryotes - 360 (source: NCBI BLink).	-0.859899	1.14987e-25	-0.966051	5.74666e-50
Solyc08g065850.1.1	ME10	1	Unknown protein	NA	NA	NA	NA	NA	NA	NA	-0.818397	1.99282e-21	-0.967733	7.40176e-51
